# Supplementary material for: Metabolomics Profiling of Vitamin D Status in Relation to Dyslipidemia
Source: MDPI journal article supplement (doi:10.3390/metabo12080771), 2022-08-22
Supplement: s1 [file s1]

## Supplementary Materials

### Metabolomics profiling of vitamin D status in relation to dyslipidemia

Hanaa Mousa<sup>1</sup>, Mohamed A. Elrayess<sup>2</sup>, Ihame Diboun<sup>3</sup>, Simon K. Jackson<sup>4</sup>, Susu M. Zughaier<sup>1\*</sup>

\* Email correspondence: Susu M. Zughaier, [szughaier@qu.edu.qa](mailto:szughaier@qu.edu.qa)

#### Supplementary Figure S1

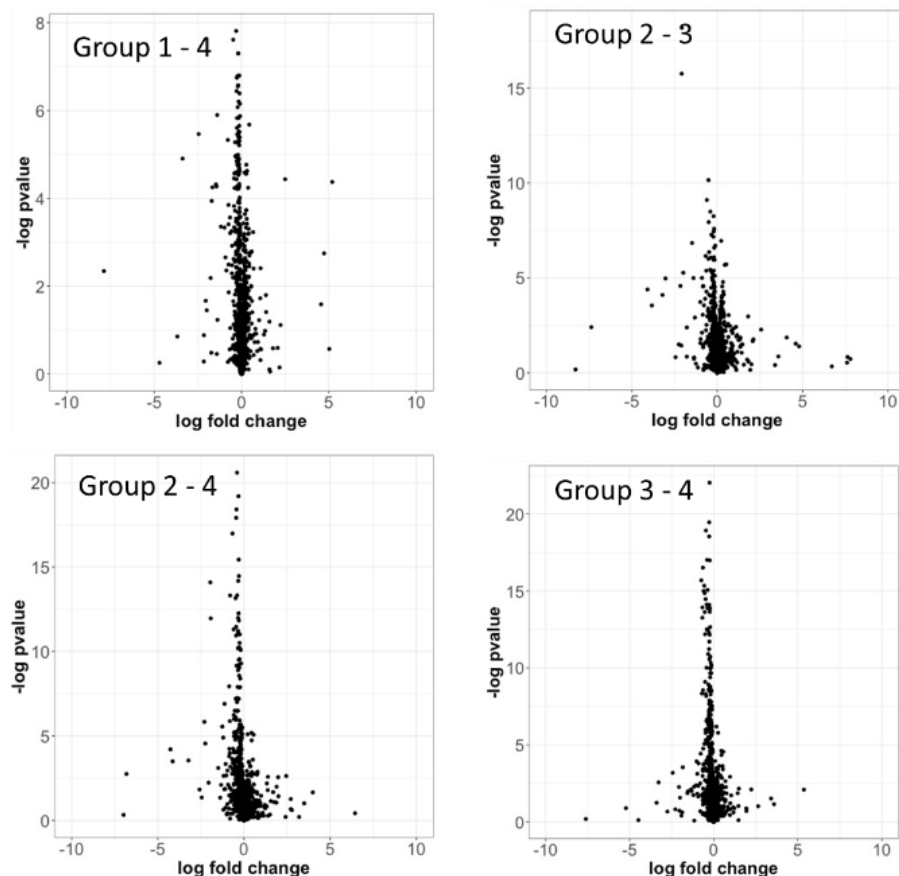

**Figure S1:** Volcano plots of metabolites enrichment among participants' groups. Vitamin D sufficient and normolipidemic (Group 1, n=64); Vitamin D sufficient and Dyslipidemia (Group 2, n=26); Vitamin D deficient and Dyslipidemia (Group 3, n=88); Vitamin D deficient and normolipidemic (Group 4, n=99).

**Supplementary Table S1**

| Metabolites with significantly different levels in <b>vitamin D sufficient groups</b> (Group 2 versus Group 1) ( Dyslipidemic versus normolipidemic participants) |                               |          |           |                      |        |
|-------------------------------------------------------------------------------------------------------------------------------------------------------------------|-------------------------------|----------|-----------|----------------------|--------|
| Metabolite Names                                                                                                                                                  | Sub-Pathway                   | Estimate | Std.Error | P.value              | FDR    |
| sphingomyelin (d18:2/23:0, d18:1/23:1, d17:1/24:1)*                                                                                                               | Sphingomyelins                | 0.27     | 0.06      | 1.34E <sup>-05</sup> | <0.001 |
| 1-palmitoyl-2-docosahexaenoyl-GPE (16:0/22:6)*                                                                                                                    | Phosphatidylethanolamine (PE) | 0.67     | 0.16      | 2.71E <sup>-05</sup> | <0.001 |
| Cholesterol                                                                                                                                                       | Sterol                        | 0.22     | 0.05      | 3.17E <sup>-05</sup> | <0.001 |
| sphingomyelin (d18:2/21:0, d16:2/23:0)*                                                                                                                           | Sphingomyelins                | 0.29     | 0.07      | 3.56E <sup>-05</sup> | <0.001 |
| sphingomyelin (d18:1/24:1, d18:2/24:0)*                                                                                                                           | Sphingomyelins                | 0.22     | 0.05      | 6.71E <sup>-05</sup> | <0.001 |
| sphingomyelin (d18:1/21:0, d17:1/22:0, d16:1/23:0)*                                                                                                               | Sphingomyelins                | 0.30     | 0.07      | 8.17E <sup>-05</sup> | 0.01   |
| sphingomyelin (d18:1/22:1, d18:2/22:0, d16:1/24:1)*                                                                                                               | Sphingomyelins                | 0.20     | 0.06      | 2.91E <sup>-04</sup> | 0.02   |
| sphingomyelin (d18:2/16:0, d18:1/16:1)*                                                                                                                           | Sphingomyelins                | 0.19     | 0.05      | 3.82E <sup>-04</sup> | 0.02   |
| sphingomyelin (d18:1/24:1, d18:2/24:0)*                                                                                                                           | Sphingomyelins                | 0.23     | 0.07      | 5.90E <sup>-04</sup> | 0.03   |
| sphingomyelin (d18:2/23:1)*                                                                                                                                       | Sphingomyelins                | 0.26     | 0.07      | 7.16E <sup>-04</sup> | 0.03   |
| sphingomyelin (d18:2/24:1, d18:1/24:2)*                                                                                                                           | Sphingomyelins                | 0.20     | 0.06      | 7.18E <sup>-04</sup> | 0.03   |
| 1-oleoyl-2-docosahexaenoyl-GPC (18:1/22:6)*                                                                                                                       | Phosphatidylcholine (PC)      | 0.36     | 0.11      | 1.31E <sup>-03</sup> | 0.04   |
| sphingomyelin (d17:1/16:0, d18:1/15:0, d16:1/17:0)*                                                                                                               | Sphingomyelins                | 0.21     | 0.06      | 1.31E <sup>-03</sup> | 0.04   |
| sphingomyelin (d18:1/20:0, d16:1/22:0)*                                                                                                                           | Sphingomyelins                | 0.21     | 0.06      | 1.55E <sup>-03</sup> | 0.05   |
| hydroxy-CMPF*                                                                                                                                                     | Fatty Acid, Dicarboxylate     | 1.17     | 0.37      | 1.55E <sup>-03</sup> | 0.05   |
| 3-carboxy-4-methyl-5-propyl-2-furanpropanoate (CMPF)                                                                                                              | Fatty Acid, Dicarboxylate     | 1.27     | 0.40      | 1.57E <sup>-03</sup> | 0.05   |
| sphingomyelin (d18:1/20:1, d18:2/20:0)*                                                                                                                           | Sphingomyelins                | 0.18     | 0.06      | 1.59E <sup>-03</sup> | 0.05   |
| sphingomyelin (d18:2/14:0, d18:1/14:1)*                                                                                                                           | Sphingomyelins                | 0.24     | 0.07      | 1.60E <sup>-03</sup> | 0.05   |
| behenoyl sphingomyelin (d18:1/22:0)*                                                                                                                              | Sphingomyelins                | 0.20     | 0.06      | 1.80E <sup>-03</sup> | 0.05   |
| palmitoyl dihydrosphingomyelin (d18:0/16:0)*                                                                                                                      | Dihydrosphingomyelins         | 0.21     | 0.07      | 1.81E <sup>-03</sup> | 0.05   |

**Supplementary Table S2**

| Metabolites with significantly different levels in <b>vitamin D deficient groups</b> (Group 4 versus Group 3) (Normolipidemic versus dyslipidemic participants) |                               |          |           |                      |        |
|-----------------------------------------------------------------------------------------------------------------------------------------------------------------|-------------------------------|----------|-----------|----------------------|--------|
| Metabolite Names                                                                                                                                                | Sub-Pathway                   | Estimate | Std.Error | P.value              | FDR    |
| Cholesterol                                                                                                                                                     | Sterol                        | -0.24    | 0.04      | 2.70E <sup>-10</sup> | <0.001 |
| N-palmitoyl-sphinganine (d18:0/16:0)                                                                                                                            | Ceramides                     | -0.27    | 0.04      | 3.54E <sup>-09</sup> | <0.001 |
| 1-palmitoyl-2-dihomo-linolenoyl-GPC (16:0/20:3n3 or 6)*                                                                                                         | Phosphatidylcholine (PC)      | -0.46    | 0.08      | 6.03E <sup>-09</sup> | <0.001 |
| 1-stearoyl-GPC (18:0)                                                                                                                                           | Lysophospholipid              | -0.27    | 0.05      | 8.86E <sup>-09</sup> | <0.001 |
| 1-stearoyl-GPE (18:0)                                                                                                                                           | Lysophospholipid              | -0.40    | 0.07      | 4.08E <sup>-08</sup> | <0.001 |
| 1-palmitoyl-GPC (16:0)                                                                                                                                          | Lysophospholipid              | -0.24    | 0.04      | 4.21E <sup>-08</sup> | <0.001 |
| 1-myristoyl-2-arachidonoyl-GPC (14:0/20:4)*                                                                                                                     | Phosphatidylcholine (PC)      | -0.65    | 0.12      | 6.73E <sup>-08</sup> | <0.001 |
| 1-stearoyl-2-oleoyl-GPE (18:0/18:1)                                                                                                                             | Phosphatidylethanolamine (PE) | -0.74    | 0.14      | 1.54E <sup>-07</sup> | <0.001 |
| oleoyl-linoleoyl-glycerol (18:1/18:2) [2]                                                                                                                       | Diacylglycerol                | -0.57    | 0.11      | 2.18E <sup>-07</sup> | <0.001 |
| 1-linoleoyl-2-arachidonoyl-GPC (18:2/20:4n6)*                                                                                                                   | Phosphatidylcholine (PC)      | -0.37    | 0.07      | 2.87E <sup>-07</sup> | <0.001 |
| 1-palmitoyl-2-linoleoyl-GPE (16:0/18:2)                                                                                                                         | Phosphatidylethanolamine (PE) | -0.60    | 0.11      | 3.06E <sup>-07</sup> | <0.001 |
| 1-linolenoyl-GPC (18:3)*                                                                                                                                        | Lysophospholipid              | -0.54    | 0.10      | 3.53E <sup>-07</sup> | <0.001 |
| 1-stearoyl-2-linoleoyl-GPE (18:0/18:2)*                                                                                                                         | Phosphatidylethanolamine (PE) | -0.48    | 0.09      | 5.21E <sup>-07</sup> | <0.001 |
| 1-stearoyl-2-oleoyl-GPC (18:0/18:1)                                                                                                                             | Phosphatidylcholine (PC)      | -0.43    | 0.08      | 7.40E <sup>-07</sup> | <0.001 |
| sphingomyelin (d18:1/21:0, d17:1/22:0, d16:1/23:0)*                                                                                                             | Sphingomyelins                | -0.27    | 0.05      | 7.49E <sup>-07</sup> | <0.001 |
| 1-myristoyl-2-palmitoyl-GPC (14:0/16:0)                                                                                                                         | Phosphatidylcholine (PC)      | -0.68    | 0.13      | 8.95E <sup>-07</sup> | <0.001 |
| 1-palmitoleoyl-GPC (16:1)*                                                                                                                                      | Lysophospholipid              | -0.37    | 0.07      | 9.32E <sup>-07</sup> | <0.001 |
| behenoyl sphingomyelin (d18:1/22:0)*                                                                                                                            | Sphingomyelins                | -0.23    | 0.05      | 9.32E <sup>-07</sup> | <0.001 |
| retinol (Vitamin A)                                                                                                                                             | Vitamin A Metabolism          | -0.26    | 0.05      | 9.77E <sup>-07</sup> | <0.001 |
| oleoyl-linoleoyl-glycerol (18:1/18:2) [1]                                                                                                                       | Diacylglycerol                | -0.54    | 0.11      | 1.20E <sup>-06</sup> | <0.001 |
| 1-oleoyl-GPC (18:1)                                                                                                                                             | Lysophospholipid              | -0.24    | 0.05      | 1.19E <sup>-06</sup> | <0.001 |

|                                                     |                               |       |      |                      |        |
|-----------------------------------------------------|-------------------------------|-------|------|----------------------|--------|
| 1-palmitoyl-2-oleoyl-GPE (16:0/18:1)                | Phosphatidylethanolamine (PE) | -0.68 | 0.14 | 1.74E <sup>-06</sup> | <0.001 |
| alpha-tocopherol                                    | Tocopherol Metabolism         | -0.21 | 0.04 | 3.20E <sup>-06</sup> | <0.001 |
| 1-linoleoyl-GPE (18:2)*                             | Lysophospholipid              | -0.41 | 0.09 | 3.68E <sup>-06</sup> | <0.001 |
| 1-palmitoyl-GPE (16:0)                              | Lysophospholipid              | -0.36 | 0.08 | 3.87E <sup>-06</sup> | <0.001 |
| 1-arachidonoyl-GPE (20:4n6)*                        | Lysophospholipid              | -0.29 | 0.06 | 4.49E <sup>-06</sup> | <0.001 |
| 1-palmitoyl-2-palmitoleoyl-GPC (16:0/16:1)*         | Phosphatidylcholine (PC)      | -0.52 | 0.11 | 5.11E <sup>-06</sup> | <0.001 |
| sphingomyelin (d18:1/14:0, d16:1/16:0)*             | Sphingomyelins                | -0.24 | 0.05 | 5.27E <sup>-06</sup> | <0.001 |
| 1-palmitoyl-2-oleoyl-GPC (16:0/18:1)                | Phosphatidylcholine (PC)      | -0.26 | 0.06 | 8.22E <sup>-06</sup> | <0.001 |
| 1-stearoyl-2-arachidonoyl-GPC (18:0/20:4)           | Phosphatidylcholine (PC)      | -0.28 | 0.06 | 1.33E <sup>-05</sup> | <0.001 |
| 1-stearoyl-2-arachidonoyl-GPE (18:0/20:4)           | Phosphatidylethanolamine (PE) | -0.33 | 0.08 | 1.84E <sup>-05</sup> | <0.001 |
| sphingomyelin (d18:1/20:0, d16:1/22:0)*             | Sphingomyelins                | -0.20 | 0.05 | 2.19E <sup>-05</sup> | <0.001 |
| 1-palmitoyl-2-arachidonoyl-GPC (16:0/20:4n6)        | Phosphatidylcholine (PC)      | -0.25 | 0.06 | 2.56E <sup>-05</sup> | <0.001 |
| sphingomyelin (d18:2/23:0, d18:1/23:1, d17:1/24:1)* | Sphingomyelins                | -0.19 | 0.04 | 3.20E <sup>-05</sup> | <0.001 |
| Tryptophan                                          | Tryptophan Metabolism         | -0.15 | 0.04 | 3.77E <sup>-05</sup> | <0.001 |
| Glycerophosphoethanolamine                          | Phospholipid Metabolism       | -0.17 | 0.04 | 4.42E <sup>-05</sup> | <0.001 |
| 1-palmitoyl-2-arachidonoyl-GPE (16:0/20:4)*         | Phosphatidylethanolamine (PE) | -0.43 | 0.10 | 4.48E <sup>-05</sup> | <0.001 |
| sphingomyelin (d18:2/14:0, d18:1/14:1)*             | Sphingomyelins                | -0.22 | 0.05 | 4.60E <sup>-05</sup> | <0.001 |
| 1-linoleoyl-GPC (18:2)                              | Lysophospholipid              | -0.20 | 0.05 | 4.76E <sup>-05</sup> | <0.001 |
| sphingomyelin (d17:1/16:0, d18:1/15:0, d16:1/17:0)* | Sphingomyelins                | -0.19 | 0.05 | 6.19E <sup>-05</sup> | <0.001 |
| sphingomyelin (d18:1/22:1, d18:2/22:0, d16:1/24:1)* | Sphingomyelins                | -0.16 | 0.04 | 6.38E <sup>-05</sup> | <0.001 |
| sphingomyelin (d18:2/21:0, d16:2/23:0)*             | Sphingomyelins                | -0.21 | 0.05 | 6.54E <sup>-05</sup> | <0.001 |
| 1-arachidonoyl-GPC (20:4n6)*                        | Lysophospholipid              | -0.21 | 0.05 | 8.38E <sup>-05</sup> | 0.01   |
| linoleoyl-linoleoyl-glycerol (18:2/18:2) [1]*       | Diacylglycerol                | -0.52 | 0.13 | 1.12E <sup>-04</sup> | 0.01   |
| glycosyl ceramide (d18:1/20:0, d16:1/22:0)*         | Hexosylceramides (HCER)       | -0.32 | 0.08 | 1.33E <sup>-04</sup> | 0.01   |

|                                                    |                                                              |       |      |                      |      |
|----------------------------------------------------|--------------------------------------------------------------|-------|------|----------------------|------|
| 3-methyl-2-oxovalerate                             | Leucine, Isoleucine and Valine Metabolism                    | -0.21 | 0.05 | 1.53E <sup>-04</sup> | 0.01 |
| sphingomyelin (d18:1/19:0, d19:1/18:0)*            | Sphingomyelins                                               | -0.21 | 0.06 | 1.61E <sup>-04</sup> | 0.01 |
| 4-methyl-2-oxopentanoate                           | Leucine, Isoleucine and Valine Metabolism                    | -0.21 | 0.06 | 1.72E <sup>-04</sup> | 0.01 |
| glycosyl-N-stearoyl-sphingosine (d18:1/18:0)       | Hexosylceramides (HCER)                                      | -0.30 | 0.08 | 1.86E <sup>-04</sup> | 0.01 |
| 1-palmitoleoylglycerol (16:1)*                     | Monoacylglycerol                                             | -0.64 | 0.17 | 1.93E <sup>-04</sup> | 0.01 |
| sphingomyelin (d17:1/14:0, d16:1/15:0)*            | Sphingomyelins                                               | -0.27 | 0.07 | 2.03E <sup>-04</sup> | 0.01 |
| sphingomyelin (d18:2/16:0, d18:1/16:1)*            | Sphingomyelins                                               | -0.15 | 0.04 | 2.07E <sup>-04</sup> | 0.01 |
| 1-linoleoylglycerol (18:2)                         | Monoacylglycerol                                             | -0.70 | 0.19 | 2.40E <sup>-04</sup> | 0.01 |
| 1-stearoyl-GPE (18:0)                              | Lysophospholipid                                             | -0.48 | 0.13 | 2.48E <sup>-04</sup> | 0.01 |
| 1,2-dipalmitoyl-GPC (16:0/16:0)                    | Phosphatidylcholine (PC)                                     | -0.19 | 0.05 | 2.55E <sup>-04</sup> | 0.01 |
| 1-palmitoyl-GPI (16:0)                             | Lysophospholipid                                             | -0.44 | 0.12 | 2.83E <sup>-04</sup> | 0.01 |
| 1-stearoyl-2-arachidonoyl-GPI (18:0/20:4)          | Phosphatidylinositol (PI)                                    | -0.16 | 0.04 | 4.06E <sup>-04</sup> | 0.02 |
| sphingomyelin (d18:1/17:0, d17:1/18:0, d19:1/16:0) | Sphingomyelins                                               | -0.18 | 0.05 | 4.27E <sup>-04</sup> | 0.02 |
| palmitoylcarnitine (C16)                           | Fatty Acid Metabolism (Acyl Carnitine, Long Chain Saturated) | -0.26 | 0.07 | 4.56E <sup>-04</sup> | 0.02 |
| 1-stearoyl-2-docosahexaenoyl-GPC (18:0/22:6)       | Phosphatidylcholine (PC)                                     | -0.25 | 0.07 | 4.80E <sup>-04</sup> | 0.02 |
| 1-stearoyl-2-linoleoyl-GPC (18:0/18:2)*            | Phosphatidylcholine (PC)                                     | -0.14 | 0.04 | 5.33E <sup>-04</sup> | 0.02 |
| glycerophosphorylcholine (GPC)                     | Phospholipid Metabolism                                      | -0.09 | 0.03 | 5.46E <sup>-04</sup> | 0.02 |
| Indoleacetate                                      | Tryptophan Metabolism                                        | -0.19 | 0.06 | 6.00E <sup>-04</sup> | 0.03 |
| myristoyl dihydrosphingomyelin (d18:0/14:0)*       | Dihydrosphingomyelins                                        | -0.22 | 0.06 | 6.38E <sup>-04</sup> | 0.03 |
| Leucine                                            | Leucine, Isoleucine and Valine Metabolism                    | -0.10 | 0.03 | 6.84E <sup>-04</sup> | 0.03 |
| N-stearoyl-sphingosine (d18:1/18:0)*               | Ceramides                                                    | -0.27 | 0.08 | 7.25E <sup>-04</sup> | 0.03 |
| 1-palmitoyl-2-arachidonoyl-GPI (16:0/20:4)*        | Phosphatidylinositol (PI)                                    | -0.28 | 0.08 | 7.48E <sup>-04</sup> | 0.03 |
| 1-(1-enyl-stearoyl)-2-linoleoyl-GPE (P-18:0/18:2)* | Plasmalogen                                                  | -0.27 | 0.08 | 8.48E <sup>-04</sup> | 0.03 |

|                                                |                                           |       |      |                      |      |
|------------------------------------------------|-------------------------------------------|-------|------|----------------------|------|
| 1-palmitoyl-2-docosa-hexaenoyl-GPC (16:0/22:6) | Phosphatidylcholine (PC)                  | -0.23 | 0.07 | 8.98E <sup>-04</sup> | 0.03 |
| sphingomyelin (d18:2/18:1)*                    | Sphingomyelins                            | -0.17 | 0.05 | 9.54E <sup>-04</sup> | 0.04 |
| 1-arachidonoyl-GPI (20:4)*                     | Lysophospholipid                          | -0.29 | 0.09 | 9.82E <sup>-04</sup> | 0.04 |
| isovalerylcarnitine (C5)                       | Leucine, Isoleucine and Valine Metabolism | -0.33 | 0.10 | 1.20E <sup>-03</sup> | 0.04 |
| 1-palmitoyl-2-linoleoyl-GPI (16:0/18:2)        | Phosphatidylinositol (PI)                 | -0.23 | 0.07 | 1.22E <sup>-03</sup> | 0.04 |
| N-palmitoyl-sphingadienine (d18:2/16:0)*       | Dihydroceramides                          | -0.41 | 0.13 | 1.33E <sup>-03</sup> | 0.04 |
| glycosyl-N-palmitoyl-sphingosine (d18:1/16:0)  | Hexosylceramides (HCER)                   | -0.17 | 0.05 | 1.32E <sup>-03</sup> | 0.04 |
| dihomo-linolenoyl-choline                      | Fatty Acid Metabolism (Acyl Choline)      | -0.43 | 0.13 | 1.46E <sup>-03</sup> | 0.05 |
| xanthure.te                                    | Tryptophan Metabolism                     | -0.34 | 0.11 | 1.55E <sup>-03</sup> | 0.05 |
| N-acetylneurami.te                             | Aminosugar Metabolism                     | -0.20 | 0.06 | 1.55E <sup>-03</sup> | 0.05 |
| 1-palmitoyl-2-linoleoyl-GPC (16:0/18:2)        | Phosphatidylcholine (PC)                  | -0.13 | 0.04 | 1.60E <sup>-03</sup> | 0.05 |
| 1-oleoyl-2-docosa-hexaenoyl-GPC (18:1/22:6)*   | Phosphatidylcholine (PC)                  | -0.26 | 0.08 | 1.66E <sup>-03</sup> | 0.05 |
| 1,2-dilinoleoyl-GPC (18:2/18:2)                | Phosphatidylcholine (PC)                  | -0.32 | 0.10 | 1.79E <sup>-03</sup> | 0.05 |
| sphingomyelin (d17:2/16:0, d18:2/15:0)*        | Sphingomyelins                            | -0.18 | 0.06 | 1.83E <sup>-03</sup> | 0.05 |

**Supplementary Table S3**

| Metabolites with significantly different levels in <i>normolipidemics groups</i> (Group 4 versus Group 1) vitamin D deficient versus sufficient participants |                                                      |          |           |                      |      |
|--------------------------------------------------------------------------------------------------------------------------------------------------------------|------------------------------------------------------|----------|-----------|----------------------|------|
| Metabolite Names                                                                                                                                             | Sub-Pathway                                          | Estimate | Std.Error | P.value              | FDR  |
| 1-oleoyl-2-docosahexaenoyl-GPC (18:1/22:6)*                                                                                                                  | Phosphatidylcholine (PC)                             | -0.31    | 0.09      | 4.04E <sup>-04</sup> | 0.02 |
| Ergothioneine                                                                                                                                                | Food Component/Plant                                 | -0.48    | 0.13      | 4.94E <sup>-04</sup> | 0.02 |
| Urea                                                                                                                                                         | Urea cycle; Arginine and Proline Metabolism          | -0.19    | 0.05      | 6.73E <sup>-04</sup> | 0.03 |
| 4-methyl-2-oxopentanoate                                                                                                                                     | Leucine, Isoleucine and Valine Metabolism            | -0.20    | 0.06      | 6.76E <sup>-04</sup> | 0.03 |
| Valine                                                                                                                                                       | Leucine, Isoleucine and Valine Metabolism            | -0.13    | 0.04      | 1.12E <sup>-03</sup> | 0.04 |
| arabo.te/xylo.te                                                                                                                                             | Pentose Metabolism                                   | -0.23    | 0.07      | 1.13E <sup>-03</sup> | 0.04 |
| 1-(1-enyl-oleoyl)-GPE (P-18:1)*                                                                                                                              | Lysoplasmalogen                                      | -0.27    | 0.08      | 1.18E <sup>-03</sup> | 0.04 |
| Allantoin                                                                                                                                                    | Purine Metabolism, (Hypo)Xanthine/Inosine containing | -0.19    | 0.06      | 1.39E <sup>-03</sup> | 0.05 |
| methionine sulfone                                                                                                                                           | Methionine, Cysteine, SAM and Taurine Metabolism     | -0.22    | 0.07      | 1.43E <sup>-03</sup> | 0.05 |
| 1-(1-enyl-stearoyl)-GPE (P-18:0)*                                                                                                                            | Lysoplasmalogen                                      | -0.28    | 0.09      | 1.59E <sup>-03</sup> | 0.05 |
| Tryptophan                                                                                                                                                   | Tryptophan Metabolism                                | -0.12    | 0.04      | 1.68E <sup>-03</sup> | 0.05 |

**Supplementary Table S4**

| Metabolites with significantly different levels in <i>dyslipidemics groups</i> (group 3 versus group 2) vitamin D deficient versus sufficient participants |                                                   |          |           |                      |        |
|------------------------------------------------------------------------------------------------------------------------------------------------------------|---------------------------------------------------|----------|-----------|----------------------|--------|
| Metabolite Names                                                                                                                                           | Sub-Pathway                                       | Estimate | Std.Error | P.value              | FDR    |
| hydroxy-CMPF*                                                                                                                                              | Fatty Acid, Dicarboxylate                         | -2.08    | -5.87     | 1.28E <sup>-08</sup> | <0.001 |
| 3-carboxy-4-methyl-5-propyl-2-furanpropanoate (CMPF)                                                                                                       | Fatty Acid, Dicarboxylate                         | -2.09    | -5.41     | 1.44E <sup>-07</sup> | <0.001 |
| docosahexaenoate (DHA; 22:6n3)                                                                                                                             | Long Chain Polyunsaturated Fatty Acid (n3 and n6) | -0.52    | -4.18     | 3.90E <sup>-05</sup> | <0.001 |
| S-methylcysteine sulfoxide                                                                                                                                 | Methionine, Cysteine, SAM and Taurine Metabolism  | -0.62    | -3.92     | 1.11E <sup>-04</sup> | 0.01   |
| 1-oleoyl-2-docosahexaenoyl-GPC (18:1/22:6)*                                                                                                                | Phosphatidylcholine (PC)                          | -0.41    | -3.76     | 2.05E <sup>-04</sup> | 0.01   |
| sphingomyelin (d18:2/23:0, d18:1/23:1, d17:1/24:1)*                                                                                                        | Sphingomyelins                                    | -0.22    | -3.70     | 2.61E <sup>-04</sup> | 0.01   |
| perfluorooctanoate (PFOA)                                                                                                                                  | Chemical                                          | -0.51    | -3.62     | 3.56E <sup>-04</sup> | 0.02   |
| sphingomyelin (d18:1/24:1, d18:2/24:0)*                                                                                                                    | Sphingomyelins                                    | -0.19    | -3.52     | 5.05E <sup>-04</sup> | 0.02   |
| hydroxypalmitoyl sphingomyelin (d18:1/16:0(OH))**                                                                                                          | Sphingomyelins                                    | -0.21    | -3.48     | 5.81E <sup>-04</sup> | 0.03   |
| tartro.te (hydroxymalo.te)                                                                                                                                 | Food Component/Plant                              | -0.34    | -3.43     | 6.93E <sup>-04</sup> | 0.03   |
| sphingomyelin (d18:2/21:0, d16:2/23:0)*                                                                                                                    | Sphingomyelins                                    | -0.23    | -3.40     | 7.73E <sup>-04</sup> | 0.03   |
| 2-hydroxyglutarate                                                                                                                                         | Fatty Acid, Dicarboxylate                         | 0.23     | 3.34      | 9.57E <sup>-04</sup> | 0.04   |
| Lysine                                                                                                                                                     | Lysine Metabolism                                 | -0.13    | -3.27     | 1.23E <sup>-03</sup> | 0.04   |
| sphingomyelin (d18:2/24:1, d18:1/24:2)*                                                                                                                    | Sphingomyelins                                    | -0.18    | -3.23     | 1.38E <sup>-03</sup> | 0.05   |
| 1-palmitoyl-2-docosahexaenoyl-GPE (16:0/22:6)*                                                                                                             | Phosphatidylethanolamine (PE)                     | -0.48    | -3.16     | 1.73E <sup>-03</sup> | 0.05   |



**Appendix S1:** The variable influence on projection (VIP) list indicating top metabolites that differentiate the four groups

| Primary ID                                    | M1.VIP[3+1+0] | M1.VIP[3]cvSE<br>* 2.44693 |
|-----------------------------------------------|---------------|----------------------------|
| cholesterol                                   | 2.36969       | 0.834622                   |
| topiramate(-0.209857)                         | 2.36638       | 5.31995                    |
| metoprolol(0.366655)                          | 2.36638       | 5.31995                    |
| Suciprofloxacin(0.0701788)                    | 2.36638       | 5.31995                    |
| saccharin(0.316561)                           | 2.36638       | 5.31995                    |
| bradykinin(0.297286)                          | 2.36638       | 5.31995                    |
| bradykinin..hydroxy.pro.3.(0.327431)          | 2.36638       | 5.31995                    |
| bradykinin..des.arg.9.(0)                     | 2.36638       | 5.31995                    |
| pioglitazone(0)                               | 2.36638       | 5.31995                    |
| Fibrinopeptide.A..phosphono.ser.3..(0.125222) | 2.36638       | 5.31995                    |
| HXGXA.(0.126016)                              | 2.36638       | 5.31995                    |
| lidocaine(-0.151288)                          | 2.36638       | 5.31995                    |
| carbamazepine(0.326278)                       | 2.36638       | 5.31995                    |
| Nimesulide(0.538888)                          | 2.36638       | 5.31995                    |
| nornicotine(0.808037)                         | 2.36638       | 5.31995                    |
| carbamazepine.glucuronide.(0.411977)          | 2.36638       | 5.31995                    |
| oxypurinol(-0.0997098)                        | 2.36638       | 5.31995                    |
| pseudoephedrine(0.0636319)                    | 2.36638       | 5.31995                    |
| quetiapine(0.530628)                          | 2.36638       | 5.31995                    |
| doxycycline(0.291325)                         | 2.36638       | 5.31995                    |
| leucylglycine(0.10084)                        | 2.36638       | 5.31995                    |
| mirtazapine(-0.691948)                        | 2.36638       | 5.31995                    |
| verapamil(0.0993022)                          | 2.36638       | 5.31995                    |
| furosemide(0.513362)                          | 2.36638       | 5.31995                    |
| o.hydroxyatorvastatin(-0.459816)              | 2.36638       | 5.31995                    |

|                                                    |         |          |
|----------------------------------------------------|---------|----------|
| olmesartan(0.173281)                               | 2.36638 | 5.31995  |
| daidzein.sulfate..2.(-0.101258)                    | 2.36638 | 5.31995  |
| alpha.hydroxymetoprolol(0.0978524)                 | 2.36638 | 5.31995  |
| rivaroxaban(1.3156)                                | 2.36638 | 5.31995  |
| tadalafil(0.157602)                                | 2.36638 | 5.31995  |
| cetirizine(0.485692)                               | 2.36638 | 5.31995  |
| mycophenolic.acid.glucuronide(-1.17151)            | 2.36638 | 5.31995  |
| sulfamethoxazole(0.036814)                         | 2.36638 | 5.31995  |
| dexlansoprazole(0.859974)                          | 2.36638 | 5.31995  |
| metronidazole(0.154179)                            | 2.36638 | 5.31995  |
| moxifloxacin(0.432496)                             | 2.36638 | 5.31995  |
| fluco.zole(0.0695261)                              | 2.36638 | 5.31995  |
| THC.carboxylic.acid.glucuronide(0.698234)          | 2.36638 | 5.31995  |
| resveratrol.disulfate..1..(0.127601)               | 2.36638 | 5.31995  |
| montelukast(0.301289)                              | 2.36638 | 5.31995  |
| tamoxifen(-0.885761)                               | 2.36638 | 5.31995  |
| Urolithin.B.glucuronide(-0.0322133)                | 2.36638 | 5.31995  |
| Gliclazide(1.39632)                                | 2.36638 | 5.31995  |
| X...12407(-0.316905)                               | 2.36638 | 5.31995  |
| X...16649(0.141065)                                | 2.36638 | 5.31995  |
| X...21315(-0.458233)                               | 2.36638 | 5.31995  |
| X...24576(0.142974)                                | 2.36638 | 5.31995  |
| X...25503(-0.0144032)                              | 2.36638 | 5.31995  |
| X...25523(-0.355961)                               | 2.36638 | 5.31995  |
| X1.stearoyl.2.oleoyl.GPE..18.0.18.1.               | 2.34805 | 0.694351 |
| X1.stearoyl.GPC..18.0.                             | 2.25932 | 0.330957 |
| sphingomyelin..d18.1.17.0..d17.1.18.0..d19.1.16.0. | 2.25362 | 0.943465 |
| sphingomyelin..d18.1.19.0..d19.1.18.0..            | 2.25154 | 1.05206  |

|                                                          |         |          |
|----------------------------------------------------------|---------|----------|
| sphingomyelin..d18.1.24.1..d18.2.24.0..                  | 2.21323 | 0.679924 |
| X1.stearoyl.2.oleoyl.GPC..18.0.18.1.                     | 2.20914 | 0.466183 |
| sphingomyelin..d18.2.23.0..d18.1.23.1..d17.1.24.1..      | 2.19259 | 1.129    |
| X1.palmitoyl.2.dihomo.linolenoyl.GPC..16.0.20.3n3.or.6.. | 2.18576 | 0.390977 |
| oleoyl.linoleoyl.glycerol..18.1.18.2...2.                | 2.18444 | 0.403899 |
| X1.myristoyl.2.arachidonoyl.GPC..14.0.20.4..             | 2.18213 | 0.232895 |
| sphingomyelin..d18.2.21.0..d16.2.23.0..                  | 2.17481 | 0.949588 |
| sphingomyelin..d17.2.16.0..d18.2.15.0..                  | 2.1747  | 0.621318 |
| X1.palmitoyl.2.docosahexaenoyl.GPE..16.0.22.6..          | 2.17153 | 0.690187 |
| sphingomyelin..d18.1.20.0..d16.1.22.0..                  | 2.16443 | 0.948554 |
| hydroxypalmitoyl.sphingomyelin..d18.1.16.0.OH....        | 2.15139 | 0.653774 |
| X1.stearoyl.2.arachidonoyl.GPC..18.0.20.4.               | 2.14214 | 0.330713 |
| behenoyl.sphingomyelin..d18.1.22.0..                     | 2.11965 | 0.823317 |
| retinol..Vitamin.A.                                      | 2.1121  | 0.413701 |
| X1.palmitoyl.2.oleoyl.GPE..16.0.18.1.                    | 2.08933 | 0.249534 |
| picolinoylglycine                                        | 2.08832 | 0.401619 |
| X1.palmitoyl.GPC..16.0.                                  | 2.08712 | 0.396868 |
| X1.palmitoyl.2.palmitoleoyl.GPC..16.0.16.1..             | 2.08207 | 0.577945 |
| X1.palmitoyl.2.arachidonoyl.GPC..16.0.20.4n6.            | 2.07972 | 0.229758 |
| N.palmitoyl.sphingosine..d18.1.16.0.                     | 2.07575 | 0.734881 |
| sphingomyelin..d18.1.14.0..d16.1.16.0..                  | 2.07486 | 0.769818 |
| X1.oleoyl.2.docosahexaenoyl.GPC..18.1.22.6..             | 2.06912 | 0.703712 |
| X1.palmitoyl.2.oleoyl.GPC..16.0.18.1.                    | 2.05812 | 0.47857  |
| X1.myristoyl.2.palmitoyl.GPC..14.0.16.0.                 | 2.04785 | 0.424867 |
| sphingomyelin..d17.1.14.0..d16.1.15.0..                  | 2.04485 | 0.566294 |
| X1.palmitoyl.GPE..16.0.                                  | 2.03499 | 0.400479 |
| X1.arachidonoyl.GPE..20.4n6..                            | 2.03397 | 0.268434 |

|                                                       |         |          |
|-------------------------------------------------------|---------|----------|
| sphingomyelin..d17.1.16.0..d18.1.15.0..d16.1.17.0..   | 2.03386 | 1.15378  |
| X1.palmitoleoylglycerol..16.1..                       | 2.01192 | 0.551641 |
| X1.palmitoyl.2.arachidonoyl.GPE..16.0.20.4..          | 2.00944 | 0.28702  |
| X2.stearoyl.GPE..18.0..                               | 2.00663 | 0.702131 |
| tricosanoyl.sphingomyelin..d18.1.23.0..               | 2.00171 | 0.699729 |
| X3.carboxy.4.methyl.5.propyl.2.furanpropanoate..CMPF. | 1.99954 | 0.89435  |
| docosahexaenoate..DHA..22.6n3.                        | 1.99939 | 0.450131 |
| X1.palmitoleoyl.GPC..16.1..                           | 1.99611 | 0.386379 |
| gamma.glutamylvaline                                  | 1.98876 | 0.540959 |
| X2.3.dihydroxy.5.methylthio.4.pentenoate..DMTPA..     | 1.98266 | 0.467238 |
| glutamate                                             | 1.98161 | 0.763551 |
| oleoyl.linoleoyl.glycerol..18.1.18.2...1.             | 1.98099 | 0.619825 |
| gamma.glutamylisoleucine.                             | 1.97329 | 0.505567 |
| sphingomyelin..d18.1.22.1..d18.2.22.0..d16.1.24.1..   | 1.95528 | 1.13785  |
| sphingomyelin..d18.2.24.1..d18.1.24.2..               | 1.95237 | 0.805336 |
| X1.linolenoyl.GPC..18.3..                             | 1.94059 | 0.542771 |
| isoleucine                                            | 1.92013 | 0.443313 |
| leucine                                               | 1.91238 | 0.479729 |
| palmitoyl.sphingomyelin..d18.1.16.0.                  | 1.91198 | 0.642666 |
| stearoyl.sphingomyelin..d18.1.18.0.                   | 1.90657 | 0.711397 |
| sphingomyelin..d18.2.23.1..                           | 1.9059  | 0.862992 |
| topiramate(NA)                                        | 1.90062 | 1.87973  |
| ciprofloxacin(NA)                                     | 1.90062 | 1.87973  |
| carbamazepine(NA)                                     | 1.90062 | 1.87973  |
| carbamazepine.glucuronide.(NA)                        | 1.90062 | 1.87973  |
| quetiapine(NA)                                        | 1.90062 | 1.87973  |
| mirtazapine(NA)                                       | 1.90062 | 1.87973  |

|                                                |         |          |
|------------------------------------------------|---------|----------|
| verapamil(NA)                                  | 1.90062 | 1.87973  |
| olmesartan(NA)                                 | 1.90062 | 1.87973  |
| rivaroxaban(NA)                                | 1.90062 | 1.87973  |
| moxifloxacin(NA)                               | 1.90062 | 1.87973  |
| fluco.zole(NA)                                 | 1.90062 | 1.87973  |
| tamoxifen(NA)                                  | 1.90062 | 1.87973  |
| X1.linoleoylglycerol..18.2.                    | 1.89866 | 0.673765 |
| X1.stearoyl.2.linoleoyl.GPE..18.0.18.2..       | 1.89826 | 0.513955 |
| X1.2.dipalmitoyl.GPC..16.0.16.0.               | 1.89354 | 0.342115 |
| creatinine                                     | 1.88847 | 0.477747 |
| gamma.glutamylleucine                          | 1.88607 | 0.542556 |
| eicosapentaenoate..EPA..20.5n3.                | 1.88362 | 0.64662  |
| indolelactate                                  | 1.87905 | 0.633497 |
| X1.stearoyl.2.arachidonoyl.GPE..18.0.20.4.     | 1.87793 | 0.327332 |
| hydroxy.CMPF.                                  | 1.87781 | 0.976351 |
| X1.linoleoyl.2.arachidonoyl.GPC..18.2.20.4n6.. | 1.86847 | 0.216547 |
| X...14056                                      | 1.86635 | 0.671933 |
| ergothioneine                                  | 1.86058 | 0.755894 |
| myristoyl.dihydrosphingomyelin..d18.0.14.0..   | 1.85797 | 0.488927 |
| isovalerylcarnitine..C5.                       | 1.85412 | 0.557548 |
| X1.carboxyethylphenylalanine                   | 1.84358 | 0.555876 |
| N.acetyltryptophan                             | 1.83292 | 0.644565 |
| X1.palmitoyl.2.arachidonoyl.GPI..16.0.20.4..   | 1.8236  | 0.673409 |
| X1.palmitoyl.2.linoleoyl.GPE..16.0.18.2.       | 1.82163 | 0.350314 |
| valine                                         | 1.82056 | 0.410469 |
| N.acetylcarnosine                              | 1.8036  | 0.667713 |
| N.acetylphenylalanine                          | 1.80295 | 0.679274 |
| X...11381                                      | 1.8023  | 1.45512  |

|                                              |         |          |
|----------------------------------------------|---------|----------|
| urate                                        | 1.80142 | 0.717666 |
| X1.arachidonoyl.GPC..20.4n6..                | 1.79774 | 0.30015  |
| kynurenine                                   | 1.7903  | 0.40859  |
| xanthure.te                                  | 1.78498 | 0.389665 |
| alpha.tocopherol                             | 1.77046 | 0.616832 |
| N.palmitoyl.sphingadienine..d18.2.16.0..     | 1.76538 | 0.534657 |
| doxycycline(NA)                              | 1.76033 | 1.52999  |
| sulfamethoxazole(NA)                         | 1.76033 | 1.52999  |
| tartro.te..hydroxymalo.te.                   | 1.75923 | 0.749404 |
| X2.oxoarginine.                              | 1.75436 | 0.468637 |
| X1.arachidonoyl.GPI..20.4..                  | 1.74616 | 0.908589 |
| o.hydroxyatorvastatin(NA)                    | 1.74601 | 1.60324  |
| X...11372                                    | 1.7447  | 0.868739 |
| palmitoyl.dihydrosphingomyelin..d18.0.16.0.. | 1.74418 | 0.695616 |
| tryptophan                                   | 1.74057 | 0.377358 |
| X3..4.hydroxyphenyl.lactate                  | 1.73895 | 0.678754 |
| X5alpha.preg.n.3beta.20alpha.diol.disulfate  | 1.73156 | 0.537951 |
| X1.ribosyl.imidazoleacetate.                 | 1.73054 | 0.39182  |
| N.stearoyl.sphingosine..d18.1.18.0..         | 1.72911 | 1.09875  |
| X1.oleoyl.GPE..18.1.                         | 1.72757 | 0.492827 |
| sphingomyelin..d18.1.18.1..d18.2.18.0.       | 1.72373 | 0.935222 |
| mycophenolic.acid.glucuronide(NA)            | 1.72246 | 1.86886  |
| X1.arachidonylglycerol..20.4.                | 1.72214 | 0.596492 |
| sphingomyelin..d18.0.20.0..d16.0.22.0..      | 1.71836 | 0.602218 |
| oxalate..ethanedioate.                       | 1.71314 | 0.762046 |
| cerotoylcarnitine..C26..                     | 1.71204 | 0.327408 |
| X1.oleoyl.GPC..18.1.                         | 1.70951 | 0.573724 |
| aspartate                                    | 1.70655 | 0.645563 |

|                                         |         |          |
|-----------------------------------------|---------|----------|
| gamma.glutamylphenylalanine             | 1.70617 | 0.401629 |
| X...12117                               | 1.7008  | 0.652746 |
| X...12407(NA)                           | 1.69479 | 1.49337  |
| X...25371                               | 1.69143 | 0.532042 |
| X2.methylbutyrylcarnitine..C5.          | 1.68855 | 0.394336 |
| X1.palmitoyl.GPI..16.0.                 | 1.6861  | 0.758535 |
| N6.N6.N6.trimethyllysine                | 1.68561 | 0.353946 |
| X2.aminoadipate                         | 1.68478 | 0.747301 |
| gamma.glutamylglutamate                 | 1.68361 | 0.578132 |
| sphingomyelin..d18.2.16.0..d18.1.16.1.. | 1.67504 | 1.37883  |
| X...23636                               | 1.675   | 0.36457  |
| X1.linoleoyl.GPE..18.2..                | 1.67348 | 0.408356 |
| hydroxy.N6.N6.N6.trimethyllysine.       | 1.67143 | 0.364349 |
| glycerate                               | 1.66905 | 0.507691 |
| N.acetylsoleucine                       | 1.66623 | 0.145291 |
| X1.linolenoylglycerol..18.3.            | 1.65435 | 0.428828 |
| cys.gly..oxidized                       | 1.65427 | 0.396388 |
| beta.cryptoxanthin                      | 1.65354 | 1.1428   |
| N.acetylleucine                         | 1.65341 | 0.383118 |
| X2.hydroxy.4..methylthio.butanoic.acid  | 1.65046 | 0.749371 |
| N.acetylvaline                          | 1.64899 | 0.295912 |
| X...24337                               | 1.64876 | 0.388895 |
| sphingomyelin..d18.2.14.0..d18.1.14.1.. | 1.64695 | 0.69867  |
| N1.methyladenosine                      | 1.64003 | 0.637506 |
| X3.methyl.2.oxovalerate                 | 1.63922 | 0.83924  |
| X...13553                               | 1.63093 | 0.561989 |
| X2.O.methylascorbic.acid                | 1.62789 | 0.80382  |
| palmitoylcarnitine..C16.                | 1.62702 | 0.464147 |

|                                                           |         |          |
|-----------------------------------------------------------|---------|----------|
| X1.stearoyl.GPI..18.0.                                    | 1.6248  | 0.907513 |
| sphingomyelin..d18.1.22.2..d18.2.22.1..d16.1.24.2..       | 1.62427 | 0.91522  |
| X...13866                                                 | 1.62141 | 0.920365 |
| X...12100                                                 | 1.61581 | 0.419364 |
| sphingomyelin..d18.1.20.1..d18.2.20.0..                   | 1.61414 | 1.27564  |
| X4.hydroxyglutamate                                       | 1.61078 | 0.402713 |
| X2.hydroxy.3.methylvalerate                               | 1.60805 | 0.871152 |
| phenyllactate..PLA.                                       | 1.60749 | 0.556237 |
| hydroxyasparagine..                                       | 1.59656 | 0.694661 |
| X5alpha.preg.n.3beta.20beta.diol.monosulfate..1.          | 1.59492 | 0.644417 |
| proline                                                   | 1.59129 | 0.476797 |
| X...11880                                                 | 1.58999 | 0.833707 |
| X4.methyl.2.oxopentanoate                                 | 1.58933 | 0.776015 |
| linoleoyl.linoleoyl.glycerol..18.2.18.2...1..             | 1.58595 | 0.191327 |
| glycerophosphoethanolamine                                | 1.58077 | 0.539975 |
| X5alpha.preg.n.3beta.20alpha.diol.monosulfate..2.         | 1.57783 | 0.602048 |
| tiglylcarnitine..C5.1.DC.                                 | 1.57341 | 0.654356 |
| X1.dihomo.linolenylglycerol..20.3.                        | 1.57119 | 0.372718 |
| S.methylcysteine.sulfoxide                                | 1.57102 | 1.00462  |
| X3.carboxy.4.methyl.5.pentyl.2.furanpropio.te..3.CMPFP... | 1.56741 | 1.14625  |
| phenylalanine                                             | 1.56668 | 0.462731 |
| X10.undecenoate..11.1n1.                                  | 1.56379 | 0.673739 |
| histidine.betaine..hercynine..                            | 1.56236 | 0.605237 |
| X5alpha.androstan.3alpha.17beta.diol.disulfate            | 1.56215 | 0.512361 |
| X17alpha.hydroxypregnenolone.3.sulfate                    | 1.56082 | 0.462116 |
| X7.methylguanine                                          | 1.55889 | 0.47284  |
| cystathionine                                             | 1.55776 | 0.527065 |



|                                 |         |          |
|---------------------------------|---------|----------|
| propionylcarnitine..C3.         | 1.55689 | 0.466512 |
| N.acetylglycine                 | 1.55569 | 0.547298 |
| X3.formylindole                 | 1.55023 | 0.192424 |
| pseudoephedrine(NA)             | 1.54928 | 0.626332 |
| X...23593                       | 1.54777 | 0.622125 |
| S.adenosylhomocysteine..SAH.    | 1.54635 | 0.562772 |
| alpha.hydroxyisovalerate        | 1.54389 | 0.741083 |
| X...24951                       | 1.54174 | 0.679852 |
| X5alpha.preg.n.diol.disulfate   | 1.54154 | 0.617473 |
| X2.palmitoyl.GPC..16.0..        | 1.54051 | 0.746586 |
| arabo.te.xylo.te                | 1.53759 | 1.11985  |
| X...21319                       | 1.5317  | 0.906947 |
| X4.hydroxyphenylacetylglutamine | 1.53092 | 0.454556 |
| argini.te.                      | 1.5294  | 0.579401 |
| X3.phosphoglycerate             | 1.5292  | 0.618358 |
| X...13684                       | 1.52761 | 0.654522 |
| isobutyrylcarnitine..C4.        | 1.52761 | 0.346793 |
| X5.methylthioadenosine..MTA.    | 1.52649 | 0.554774 |
| palmitoyl.ethanolamide          | 1.52492 | 0.881462 |
| ascorbic.acid.3.sulfate.        | 1.52114 | 0.647338 |
| X1.3.dimethylurate              | 1.5207  | 0.379378 |
| X...24588                       | 1.52055 | 0.594804 |
| montelukast(NA)                 | 1.51775 | 2.01045  |
| nisi.te..24.6n3.                | 1.5152  | 0.333801 |
| carotene.diol..2.               | 1.51298 | 1.3979   |
| X4.methoxyphenol.sulfate        | 1.50915 | 0.406824 |
| Nimesulide(NA)                  | 1.50425 | 2.04746  |
| X3.hydroxy.2.ethylpropio.te     | 1.49955 | 0.658845 |

|                                            |         |          |
|--------------------------------------------|---------|----------|
| carotene.diol..1.                          | 1.49954 | 1.31531  |
| eicosanedioate..C20.DC.                    | 1.49933 | 0.905991 |
| sphingosine.1.phosphate                    | 1.49806 | 0.695652 |
| EDTA                                       | 1.49629 | 0.392238 |
| gamma.glutamyltyrosine                     | 1.49608 | 0.273261 |
| alpha.ketoglutarate                        | 1.49585 | 1.03456  |
| pregnenediol.disulfate..C21H34O8S2..       | 1.49519 | 0.676365 |
| dexlansoprazole(NA)                        | 1.49467 | 1.91361  |
| X3.methyl.2.oxobutyrate                    | 1.49459 | 0.458975 |
| N2.N2.dimethylguanosine                    | 1.49246 | 1.10417  |
| X1.stearoyl.2.arachidonoyl.GPI..18.0.20.4. | 1.48885 | 0.809644 |
| glycerol.3.phosphate                       | 1.48859 | 0.714194 |
| X...19438                                  | 1.48618 | 0.648457 |
| preg.nediol.3.glucuronide                  | 1.48446 | 0.706895 |
| X1.palmitoyl.2.oleoyl.GPI..16.0.18.1..     | 1.48205 | 0.985238 |
| urea                                       | 1.4819  | 0.715778 |
| X...16935                                  | 1.48152 | 0.806944 |
| ornithine                                  | 1.48141 | 0.697112 |
| X...11308                                  | 1.4804  | 1.02549  |
| X1.palmitoyl.2.linoleoyl.GPI..16.0.18.2.   | 1.47905 | 0.903546 |
| sphingomyelin..d18.0.18.0..d19.0.17.0..    | 1.47795 | 0.785233 |
| eicosenedioate..C20.1.DC..                 | 1.47701 | 0.660435 |
| hexadecenedioate..C16.1.DC..               | 1.47468 | 0.679252 |
| dihomo.linole.te..20.3n3.or.n6.            | 1.47361 | 0.520058 |
| succinylcarnitine..C4.DC.                  | 1.4725  | 0.206076 |
| pregnenolone.sulfate                       | 1.46558 | 1.02971  |
| gamma.glutamyl.alpha.lysine                | 1.46491 | 0.444693 |
| N1.methylinosine                           | 1.46454 | 0.642763 |

|                                                        |         |          |
|--------------------------------------------------------|---------|----------|
| X...17340                                              | 1.46375 | 0.548228 |
| X...23639                                              | 1.46336 | 0.716549 |
| arabitol.xylitol                                       | 1.4631  | 0.851965 |
| X...23739                                              | 1.46278 | 0.792064 |
| X...10458                                              | 1.46269 | 0.430949 |
| X1..1.enyl.stearoyl..GPE..P.18.0..                     | 1.46267 | 0.875511 |
| cysteinylglycine                                       | 1.46096 | 0.432083 |
| erythro.te.                                            | 1.45991 | 1.2116   |
| X1.carboxyethylvaline                                  | 1.45503 | 0.52508  |
| glycochenodeoxycholate.glucuronide..1.                 | 1.45489 | 0.520447 |
| X...24306                                              | 1.45466 | 0.599904 |
| isovalerate..i5.0.                                     | 1.45203 | 0.330133 |
| perfluorooctanesulfo.te..PFOS.                         | 1.45169 | 0.565699 |
| alpha.hydroxyisocaproate                               | 1.44897 | 0.934658 |
| X1.methylhistidine                                     | 1.44815 | 0.647982 |
| X21.hydroxypregnenolone.disulfate                      | 1.43597 | 0.405892 |
| X1..1.enyl.stearoyl..2.arachidonoyl.GPE..P.18.0.20.4.. | 1.43583 | 0.451993 |
| N.acetyltyrosine                                       | 1.43555 | 0.592279 |
| hydroxybupropion(NA)                                   | 1.43246 | 1.58771  |
| sarcosine                                              | 1.4237  | 0.34737  |
| X1.methylguanidine                                     | 1.42342 | 0.514395 |
| guaiacol.sulfate                                       | 1.42244 | 0.414717 |
| alanine                                                | 1.42191 | 0.319832 |
| X4.guanidinobutanoate                                  | 1.42188 | 0.562873 |
| N2.N5.diacetylornithine                                | 1.41946 | 0.664675 |
| pantothe.te                                            | 1.41909 | 0.801667 |
| sphingomyelin..d18.2.24.2..                            | 1.41768 | 1.02116  |
| octadecenedioate..C18.1.DC.                            | 1.41222 | 0.745204 |

|                                                         |         |          |
|---------------------------------------------------------|---------|----------|
| X...21339                                               | 1.40698 | 0.868741 |
| glucuro.te                                              | 1.40675 | 0.548724 |
| X...24576(NA)                                           | 1.40312 | 1.27763  |
| X1..1.enyl.palmitoyl..2.arachidonoyl.GPE..P.16.0.20.4.. | 1.4009  | 0.379755 |
| X1.lignoceroyl.GPC..24.0.                               | 1.39624 | 0.325832 |
| stearoylcarnitine..C18.                                 | 1.39265 | 0.575675 |
| catechol.sulfate                                        | 1.3883  | 0.26045  |
| kynure.te                                               | 1.38678 | 0.391083 |
| Glc.c.sulfate.conjugate.of.C21H34O2.steroid..           | 1.38533 | 0.408187 |
| X3.4.dihydroxybutyrate                                  | 1.38495 | 0.715614 |
| methysuccinoylcarnitine                                 | 1.38471 | 0.271972 |
| X...14939                                               | 1.38418 | 0.734151 |
| X5.hydroxyindoleacetate                                 | 1.38114 | 0.552812 |
| pyruvate                                                | 1.38032 | 0.80954  |
| methyl.indole.3.acetate                                 | 1.37995 | 0.445368 |
| X1.methylurate                                          | 1.3773  | 0.317645 |
| THC.carboxylic.acid.glucuronide(NA)                     | 1.37404 | 1.35208  |
| X...24422                                               | 1.37363 | 1.1334   |
| sphingomyelin..d18.2.18.1..                             | 1.37161 | 1.10928  |
| N6.methyladenosine                                      | 1.37032 | 0.54713  |
| X5..galactosylhydroxy..L.lysine                         | 1.36983 | 0.693406 |
| homocitrulline                                          | 1.36924 | 0.377573 |
| N.formylmethionine                                      | 1.36858 | 0.799088 |
| trigonelline..N..methylnicoti.te.                       | 1.36817 | 0.448795 |
| sphingomyelin..d18.1.20.2..d18.2.20.1..d16.1.22.2..     | 1.36788 | 0.834793 |
| gamma.glutamyltryptophan                                | 1.36695 | 0.454998 |
| X1.stearoyl.GPS..18.0..                                 | 1.3654  | 0.434827 |
| gamma.glutamylhistidine                                 | 1.35821 | 0.478048 |

|                                                        |         |          |
|--------------------------------------------------------|---------|----------|
| androstenediol..3beta.17beta..disulfate..1.            | 1.35779 | 0.453993 |
| pregnenediol.sulfate..C21H34O5S..                      | 1.35675 | 0.735488 |
| threo.te                                               | 1.35446 | 0.453153 |
| X1.linoleoyl.GPC..18.2.                                | 1.35357 | 0.642691 |
| X...24295                                              | 1.35059 | 0.562764 |
| pioglitazone(NA)                                       | 1.35048 | 0.909927 |
| X1..1.enyl.palmitoyl..GPE..P.16.0..                    | 1.34995 | 0.801862 |
| picoli.te                                              | 1.34841 | 0.232229 |
| X2R.3R.dihydroxybutyrate                               | 1.34634 | 0.502985 |
| glycosyl.N.stearoyl.sphingosine..d18.1.18.0.           | 1.34596 | 0.453882 |
| deoxycholate                                           | 1.34547 | 0.468338 |
| X...15503                                              | 1.34266 | 0.269036 |
| glycocholate                                           | 1.34129 | 0.3819   |
| ascorbic.acid.2.sulfate                                | 1.33956 | 0.273657 |
| prolylglycine                                          | 1.33756 | 0.648905 |
| hydroxybupropion(0)                                    | 1.33618 | 2.71736  |
| X11beta.hydroxyandrosterone.glucuronide                | 1.33538 | 0.509354 |
| palmitoyl.sphingosine.phosphoethanolamine..d18.1.16.0. | 1.33189 | 1.03763  |
| X5.methyluridine..ribothymidine.                       | 1.33063 | 0.616118 |
| deoxycarnitine                                         | 1.32978 | 0.686815 |
| gulo.te.                                               | 1.3293  | 0.784614 |
| glycochole.te.sulfate.                                 | 1.32795 | 0.567508 |
| X...24546                                              | 1.32689 | 0.762966 |
| X...25948                                              | 1.32671 | 0.464584 |
| methyl.glucopyranoside..alpha...beta.                  | 1.32459 | 0.401401 |
| S.carboxyethylcysteine                                 | 1.32324 | 0.878134 |
| N6.carbamoylthreonyladenosine                          | 1.32291 | 0.667301 |

|                                         |         |          |
|-----------------------------------------|---------|----------|
| X4.allylphenol.sulfate                  | 1.3182  | 0.266559 |
| cysteine                                | 1.31794 | 0.369887 |
| X3.amino.2.piperidone                   | 1.31738 | 0.529176 |
| metabolonic.lactone.sulfate             | 1.31723 | 0.836544 |
| X...25828                               | 1.312   | 0.692281 |
| docosahexaenoylcholine                  | 1.31198 | 0.476756 |
| X...24494                               | 1.30992 | 0.592001 |
| vanillylmandelate..VMA.                 | 1.30958 | 1.16039  |
| eugenol.sulfate                         | 1.30896 | 0.413488 |
| serotonin                               | 1.30823 | 0.642752 |
| pregnenetriol.sulfate.                  | 1.30345 | 0.519566 |
| glycochenodeoxycholate.3.sulfate        | 1.29921 | 0.514108 |
| maltose                                 | 1.29678 | 0.456909 |
| pseudouridine                           | 1.2956  | 0.788865 |
| N.palmitoyl.sphinganine..d18.0.16.0.    | 1.29267 | 0.201323 |
| X5.6.dihydrouridine                     | 1.29254 | 0.679205 |
| X4.acetamidobutanoate                   | 1.29228 | 0.755173 |
| X...11315                               | 1.28594 | 0.968347 |
| X1.linoleoyl.GPI..18.2..                | 1.28523 | 0.902363 |
| X...24970                               | 1.28168 | 0.327752 |
| formiminoglutamate                      | 1.28101 | 0.386892 |
| X...24953                               | 1.27926 | 0.830322 |
| X3.5.dichloro.2.6.dihydroxybenzoic.acid | 1.27507 | 0.370274 |
| cysteinylglycine.disulfide.             | 1.27488 | 0.450874 |
| X.S..a.amino.omega.caprolactam          | 1.27256 | 0.386029 |
| manno.te.                               | 1.27037 | 0.754086 |
| N.acetylalanine                         | 1.26788 | 0.594361 |
| X...21733                               | 1.26731 | 0.496758 |

|                                                  |         |          |
|--------------------------------------------------|---------|----------|
| phosphoethanolamine                              | 1.26626 | 0.609998 |
| furosemide(NA)                                   | 1.26575 | 1.03346  |
| adenosine.5..monophosphate..AMP.                 | 1.26564 | 0.369244 |
| X2.hydroxypalmitate                              | 1.2645  | 0.87042  |
| hydantoin.5.propio.te                            | 1.26042 | 0.547997 |
| androstenediol..3alpha..17alpha..monosulfate..3. | 1.25984 | 0.569473 |
| X...16087                                        | 1.25939 | 0.394238 |
| branched.chain.14.0.dicarboxylic.acid..          | 1.2569  | 0.682871 |
| methionine.sulfoxide                             | 1.25646 | 0.867933 |
| X...15666                                        | 1.2561  | 0.442864 |
| X...25271                                        | 1.2554  | 0.488316 |
| N.N.N.trimethyl.alanylproline.betaine..TMAP.     | 1.25467 | 0.547325 |
| carotene.diol..3.                                | 1.2545  | 0.681629 |
| X...24544                                        | 1.25316 | 0.360999 |
| X1.linoleoyl.GPG..18.2..                         | 1.24983 | 0.57319  |
| pregnenetriol.disulfate.                         | 1.24818 | 0.428575 |
| X...11787                                        | 1.2478  | 0.93401  |
| N.acetylputrescine                               | 1.24776 | 0.625699 |
| choline                                          | 1.24775 | 0.498191 |
| N.acetylkynurenine..2.                           | 1.24352 | 0.466669 |
| arachido.te..20.4n6.                             | 1.24322 | 0.582696 |
| homostachydrine.                                 | 1.24263 | 0.653606 |
| X1..1.enyl.stearoyl..2.oleoyl.GPE..P.18.0.18.1.  | 1.24223 | 0.664782 |
| isobutyrylglycine                                | 1.23834 | 0.331091 |
| X...12844                                        | 1.23602 | 0.538304 |
| glucose                                          | 1.2354  | 0.35817  |
| nicoti.mide                                      | 1.23522 | 0.566717 |
| pentose.acid.                                    | 1.23514 | 0.602754 |

|                                                  |         |          |
|--------------------------------------------------|---------|----------|
| X3.methoxytyrosine                               | 1.23491 | 0.910159 |
| X1.oleoyl.GPI..18.1.                             | 1.23389 | 0.531263 |
| dopamine.3.O.sulfate                             | 1.23381 | 0.615629 |
| metronidazole(NA)                                | 1.23377 | 0.917157 |
| X...24456                                        | 1.23312 | 0.408924 |
| X...17346                                        | 1.23309 | 0.40597  |
| theophylline                                     | 1.22967 | 0.447031 |
| X5alpha.androstan.3beta.17beta.diol.disulfate    | 1.22957 | 0.471922 |
| glycerophosphorylcholine..GPC.                   | 1.2292  | 0.795688 |
| pyroglutamine.                                   | 1.2292  | 0.453513 |
| pipecolate                                       | 1.22665 | 0.496133 |
| X3..3.hydroxyphenyl.propio.te.sulfate            | 1.22528 | 0.274789 |
| paraxanthine                                     | 1.22288 | 0.463254 |
| citrulline                                       | 1.22116 | 0.477745 |
| methionine.sulfone                               | 1.22073 | 0.555412 |
| X...17654                                        | 1.22069 | 0.812961 |
| caffeine                                         | 1.21983 | 0.635654 |
| X1..1.enyl.oleoyl..GPE..P.18.1..                 | 1.21895 | 1.13816  |
| X...25519                                        | 1.21709 | 0.627664 |
| glycosyl.ceramide..d18.1.20.0..d16.1.22.0..      | 1.21701 | 0.538177 |
| N.methylpipecolate                               | 1.21654 | 0.35119  |
| alpha.hydroxymetoprolol(NA)                      | 1.21615 | 0.687313 |
| androstenediol..3beta.17beta..disulfate..2.      | 1.21569 | 0.411469 |
| X3.hydroxyphenylacetylglutamine                  | 1.21388 | 0.494381 |
| dimethylarginine..SDMA...ADMA.                   | 1.21261 | 0.596006 |
| X1.7.dimethylurate                               | 1.21118 | 0.666377 |
| N6.acetyllysine                                  | 1.21089 | 0.821744 |
| androstenediol..3alpha..17alpha..monosulfate..2. | 1.20995 | 0.598015 |



|                                                 |         |          |
|-------------------------------------------------|---------|----------|
| X1.methylxanthine                               | 1.2099  | 0.599299 |
| X...17653                                       | 1.20888 | 1.07938  |
| X3.indoleglyoxylic.acid                         | 1.20824 | 0.495257 |
| metoprolol(NA)                                  | 1.20681 | 1.76881  |
| X...17325                                       | 1.20633 | 0.376406 |
| X4.hydroxyphenylacetate                         | 1.20515 | 0.497452 |
| adenine                                         | 1.20495 | 0.327636 |
| N.acetylneurami.te                              | 1.20182 | 0.311579 |
| X2.6.dihydroxybenzoic.acid                      | 1.20068 | 0.506348 |
| X...21736                                       | 1.20027 | 1.23208  |
| X...18913                                       | 1.19972 | 0.459977 |
| X...23782                                       | 1.19677 | 0.984512 |
| glycochenodeoxycholate                          | 1.19674 | 0.410631 |
| X2.linoleoylglycerol..18.2.                     | 1.19658 | 0.449587 |
| N.acetylproline                                 | 1.19515 | 0.669252 |
| X7.alpha.hydroxy.3.oxo.4.cholestenoate..7.Hoca. | 1.19395 | 0.397334 |
| xanthine                                        | 1.19328 | 1.04081  |
| pro.hydroxy.pro                                 | 1.1922  | 0.584365 |
| X...21258                                       | 1.19201 | 0.353078 |
| X...17010                                       | 1.18986 | 0.238395 |
| myo.inositol                                    | 1.18874 | 0.458481 |
| lysine                                          | 1.18618 | 0.74205  |
| vanillactate                                    | 1.18396 | 0.720683 |
| docosapentaenoate..n3.DPA..22.5n3.              | 1.17844 | 0.610313 |
| X1.2.dilinoleoyl.GPC..18.2.18.2.                | 1.17808 | 0.53771  |
| X...24241                                       | 1.17709 | 0.654936 |
| hyocholate                                      | 1.1742  | 0.464021 |
| X...22162                                       | 1.17357 | 1.02228  |

|                                         |         |          |
|-----------------------------------------|---------|----------|
| X...12306                               | 1.1729  | 0.395415 |
| glycodeoxycholate.3.sulfate             | 1.17164 | 0.383427 |
| X1.methyl.4.imidazoleacetate            | 1.16891 | 0.292093 |
| X3.methylglutaryl carnitine..2.         | 1.16764 | 0.535239 |
| hippurate                               | 1.16507 | 0.317799 |
| cortisone                               | 1.16475 | 0.374737 |
| X2.hydroxyglutarate                     | 1.16335 | 0.643082 |
| X...18887                               | 1.16333 | 0.245844 |
| hexanoyl carnitine..C6.                 | 1.15939 | 0.515108 |
| X4.ethylphenylsulfate                   | 1.15929 | 0.586302 |
| trans.4.hydroxyproline                  | 1.15882 | 0.465847 |
| X...12027                               | 1.15701 | 0.321464 |
| X...21441                               | 1.15609 | 0.890581 |
| cortolone.glucuronide..1.               | 1.15264 | 0.585678 |
| X...21471                               | 1.15195 | 0.893832 |
| choline.phosphate                       | 1.1516  | 0.335755 |
| X2.hydroxystearate                      | 1.14985 | 1.07529  |
| X21.hydroxypregnenolone.monosulfate..1. | 1.14921 | 0.420562 |
| cetirizine(NA)                          | 1.1491  | 1.31236  |
| X2.hydroxyarachidate.                   | 1.14884 | 0.427313 |
| N.acetyl.2.aminooctanoate.              | 1.14832 | 0.859015 |
| tridecenedioate..C13.1.DC..             | 1.14606 | 0.5132   |
| X...18345                               | 1.14485 | 0.406509 |
| no.decanoate..19.0.                     | 1.14388 | 0.586393 |
| allantoin                               | 1.14009 | 1.00081  |
| hexadecanedioate..C16.DC.               | 1.1395  | 0.437027 |
| X1.3.7.trimethylurate                   | 1.13763 | 0.6174   |
| gamma.glutamylmethionine                | 1.1345  | 0.416407 |

|                                                                 |         |          |
|-----------------------------------------------------------------|---------|----------|
| quinoli.te                                                      | 1.13375 | 0.745627 |
| X...16964                                                       | 1.13327 | 0.592086 |
| X1..1.enyl.palmitoyl..GPC..P.16.0..                             | 1.13281 | 1.37226  |
| N.N.N.trimethyl.5.aminovalerate                                 | 1.132   | 0.289618 |
| X...12822                                                       | 1.13166 | 0.45399  |
| trimethylamine.N.oxide                                          | 1.13031 | 0.511323 |
| X2.hydroxyoctanoate                                             | 1.13025 | 0.544043 |
| X3.hydroxyisobutyrate                                           | 1.12907 | 0.470339 |
| X...21740                                                       | 1.12318 | 0.477843 |
| erythritol                                                      | 1.12003 | 0.620861 |
| X4.allylcatechol.sulfate                                        | 1.11811 | 0.318185 |
| branched.chain..straight.chain..or.cyclopropyl.12.1.fatty.acid. | 1.11791 | 1.04927  |
| serine                                                          | 1.11778 | 0.74191  |
| X...24949                                                       | 1.1135  | 0.748651 |
| X3..3.amino.3.carboxypropyl.uridine.                            | 1.1129  | 0.479819 |
| midazolam(NA)                                                   | 1.11272 | 1.59694  |
| oleoylcarnitine..C18.1.                                         | 1.11171 | 0.64372  |
| N.acetyl.1.methylhistidine.                                     | 1.11149 | 0.587476 |
| phenylpyruvate                                                  | 1.1113  | 0.397472 |
| X...12104                                                       | 1.11051 | 0.442466 |
| fluoxetine(-2.17156)                                            | 1.10946 | 2.78228  |
| topiramate(0.0442083)                                           | 1.10946 | 2.78228  |
| metoprolol(0.819295)                                            | 1.10946 | 2.78228  |
| ciprofloxacin(-0.0336602)                                       | 1.10946 | 2.78228  |
| saccharin(-0.0616627)                                           | 1.10946 | 2.78228  |
| phenolphthalein.beta.D.glucuronide(-0.766578)                   | 1.10946 | 2.78228  |
| bradykinin..hydroxy.pro.3.(-0.519362)                           | 1.10946 | 2.78228  |

|                                                   |         |         |
|---------------------------------------------------|---------|---------|
| hydroxybupropion(0.211557)                        | 1.10946 | 2.78228 |
| pioglitazone(-0.498732)                           | 1.10946 | 2.78228 |
| Fibrinopeptide.A..phosphono.ser.3..(0.422781)     | 1.10946 | 2.78228 |
| HXGXA.(-0.576787)                                 | 1.10946 | 2.78228 |
| nifedipine(0.403931)                              | 1.10946 | 2.78228 |
| nifedipine(NA)                                    | 1.10946 | 2.78228 |
| lidocaine(0.0890177)                              | 1.10946 | 2.78228 |
| carbamazepine(0.517245)                           | 1.10946 | 2.78228 |
| Nimesulide(0.453048)                              | 1.10946 | 2.78228 |
| carbamazepine.glucuronide.(-0.705422)             | 1.10946 | 2.78228 |
| oxypurinol(-0.593121)                             | 1.10946 | 2.78228 |
| pseudoephedrine(0.090937)                         | 1.10946 | 2.78228 |
| quetiapine(0)                                     | 1.10946 | 2.78228 |
| doxycycline(-0.028914)                            | 1.10946 | 2.78228 |
| leucylglycine(-0.677077)                          | 1.10946 | 2.78228 |
| oseltamivir.carboxylate..Ro.64.0802.02.(0.678237) | 1.10946 | 2.78228 |
| oseltamivir.carboxylate..Ro.64.0802.02.(NA)       | 1.10946 | 2.78228 |
| mirtazapine(-0.613782)                            | 1.10946 | 2.78228 |
| histidylalanine(0.547775)                         | 1.10946 | 2.78228 |
| norfluoxetine(0.501563)                           | 1.10946 | 2.78228 |
| verapamil(-0.549393)                              | 1.10946 | 2.78228 |
| hydroxy pioglitazone..M.IV.(-0.373095)            | 1.10946 | 2.78228 |
| furosemide(0.407197)                              | 1.10946 | 2.78228 |
| olmesartan(0.508984)                              | 1.10946 | 2.78228 |
| daidzein.sulfate..2.(-0.521381)                   | 1.10946 | 2.78228 |
| alpha.hydroxymetoprolol(-0.514332)                | 1.10946 | 2.78228 |
| rivaroxaban(-0.0497156)                           | 1.10946 | 2.78228 |
| tadalafil(-0.615076)                              | 1.10946 | 2.78228 |

|                                             |         |          |
|---------------------------------------------|---------|----------|
| cetirizine(-0.043534)                       | 1.10946 | 2.78228  |
| mycophenolic.acid.glucuronide(-0.36687)     | 1.10946 | 2.78228  |
| sulfamethoxazole(-0.657587)                 | 1.10946 | 2.78228  |
| dexlansoprazole(-0.315533)                  | 1.10946 | 2.78228  |
| metronidazole(-0.467447)                    | 1.10946 | 2.78228  |
| moxifloxacin(0.0859942)                     | 1.10946 | 2.78228  |
| fluco.zole(-0.460133)                       | 1.10946 | 2.78228  |
| THC.carboxylic.acid.glucuronide(-0.587887)  | 1.10946 | 2.78228  |
| X6.hydroxywarfarin(0.44244)                 | 1.10946 | 2.78228  |
| montelukast(0.310495)                       | 1.10946 | 2.78228  |
| midazolam(0)                                | 1.10946 | 2.78228  |
| tamoxifen(0.429247)                         | 1.10946 | 2.78228  |
| Urolithin.B.glucuronide(0.136016)           | 1.10946 | 2.78228  |
| Gliclazide(1.43127)                         | 1.10946 | 2.78228  |
| X...12407(0.655082)                         | 1.10946 | 2.78228  |
| X...16649(-0.0232686)                       | 1.10946 | 2.78228  |
| X...21315(0.290578)                         | 1.10946 | 2.78228  |
| X...21842(-0.285418)                        | 1.10946 | 2.78228  |
| X...24576(0.479768)                         | 1.10946 | 2.78228  |
| X...25503(-0.0371828)                       | 1.10946 | 2.78228  |
| X...25523(0.0912109)                        | 1.10946 | 2.78228  |
| sulfate.                                    | 1.10936 | 0.44479  |
| adenosine.3..5..cyclic.monophosphate..cAMP. | 1.10892 | 0.377656 |
| docosadioate..C22.DC.                       | 1.10714 | 0.586305 |
| margarate..17.0.                            | 1.10282 | 0.919823 |
| X1.5.anhydroglucitol..1.5.AG.               | 1.10246 | 0.399716 |
| X3.indoxyl.sulfate                          | 1.10037 | 0.304384 |
| N1.Methyl.2.pyridone.5.carboxamide          | 1.0984  | 0.578406 |

|                                               |         |          |
|-----------------------------------------------|---------|----------|
| deoxycholic.acid.glucuronide                  | 1.09757 | 0.393138 |
| indoleacetate                                 | 1.09755 | 0.791775 |
| preg.nolone.allopreg.nolone.sulfate           | 1.09596 | 0.427877 |
| Urolithin.B.glucuronide(NA)                   | 1.09431 | 0.41614  |
| X...11478                                     | 1.09418 | 0.892902 |
| N.acetylarginine                              | 1.09402 | 0.757645 |
| HXGXA.(NA)                                    | 1.09326 | 0.701779 |
| stearate..18.0.                               | 1.09278 | 0.847773 |
| caffeic.acid.sulfate                          | 1.09077 | 0.813615 |
| X...23587                                     | 1.088   | 0.917051 |
| X...17146                                     | 1.08709 | 0.392895 |
| X2..phthol.sulfate                            | 1.0868  | 0.402715 |
| X...11632                                     | 1.08612 | 0.434541 |
| oleoyl.ethanolamide                           | 1.08559 | 1.31901  |
| homoarginine                                  | 1.08168 | 0.367006 |
| X...17676                                     | 1.08042 | 0.380519 |
| X...07765                                     | 1.07866 | 0.534101 |
| stachydrine                                   | 1.07861 | 0.538876 |
| X...18921                                     | 1.07851 | 1.167    |
| erucate..22.1n9.                              | 1.07772 | 0.781386 |
| palmitate..16.0.                              | 1.07704 | 0.996066 |
| X1.linoleoyl.2.linolenoyl.GPC..18.2.18.3..    | 1.07307 | 0.598724 |
| carnitine                                     | 1.07272 | 0.267359 |
| leucylglycine(NA)                             | 1.07166 | 0.640691 |
| lactosyl.N.palmitoyl.sphingosine..d18.1.16.0. | 1.07135 | 0.932486 |
| p.hydroxybenzaldehyde                         | 1.07127 | 0.646024 |
| X3.hydroxystachydrine.                        | 1.07001 | 0.662358 |
| X5.acetylamino.6.amino.3.methyluracil         | 1.06987 | 0.638307 |

|                                                      |         |          |
|------------------------------------------------------|---------|----------|
| betonicine                                           | 1.06818 | 0.520023 |
| N.acetylthreonine                                    | 1.06648 | 0.811193 |
| X1.stearoyl.2.linoleoyl.GPC..18.0.18.2..             | 1.06518 | 0.278429 |
| N.delta.acetylorithine                               | 1.06418 | 0.330684 |
| undecenoylcarnitine..C11.1.                          | 1.05785 | 0.53339  |
| X2.hydroxydecanoate                                  | 1.05755 | 0.263723 |
| X3.hydroxypyridine.sulfate                           | 1.05393 | 0.579843 |
| laurylcarnitine..C12.                                | 1.05307 | 0.631852 |
| dodecadienoate..12.2..                               | 1.05173 | 1.60148  |
| X6.hydroxyindole.sulfate                             | 1.05047 | 0.383459 |
| octadecadienedioate..C18.2.DC..                      | 1.04898 | 0.848092 |
| X...16580                                            | 1.0486  | 0.918991 |
| X...21470                                            | 1.04812 | 0.495364 |
| X...24608                                            | 1.04737 | 0.250227 |
| glycoursodeoxycholate                                | 1.04726 | 0.478147 |
| aconitate..cis.or.trans.                             | 1.04701 | 0.60252  |
| X1..1.enyl.palmitoyl..2.palmitoyl.GPC..P.16.0.16.0.. | 1.04585 | 0.879412 |
| X...25343                                            | 1.045   | 0.915349 |
| diphenhydramine(NA)                                  | 1.04491 | 2.08292  |
| X...25790                                            | 1.04425 | 0.540193 |
| gamma.glutamylcitrulline.                            | 1.04301 | 0.811572 |
| X...24556                                            | 1.04136 | 0.638379 |
| cortisol                                             | 1.04004 | 0.375016 |
| dimethylglycine                                      | 1.03984 | 0.544767 |
| X...13835                                            | 1.03805 | 0.534939 |
| N.acetylglucosaminylasparagine                       | 1.0352  | 0.701024 |
| taurine                                              | 1.03484 | 0.745325 |
| X1..1.enyl.stearoyl..2.linoleoyl.GPE..P.18.0.18.2..  | 1.03455 | 0.773045 |

|                                                    |          |          |
|----------------------------------------------------|----------|----------|
| citalopram.propio.te.(NA)                          | 1.03224  | 1.09445  |
| X...23648                                          | 1.02983  | 0.344272 |
| N.acetylcitrulline                                 | 1.02949  | 0.430564 |
| gamma.CEHC.glucuronide.                            | 1.02756  | 0.359413 |
| X...21442                                          | 1.02471  | 0.226578 |
| N.acetylasparagine                                 | 1.02426  | 0.736629 |
| X2.hydroxyphenylacetate                            | 1.02396  | 0.387142 |
| C.glycosyltryptophan                               | 1.01928  | 0.642851 |
| glutamine.conjugate.of.C7H12O2.                    | 1.01876  | 0.524385 |
| X3.bromo.5.chloro.2.6.dihydroxybenzoic.acid.       | 1.01856  | 0.380064 |
| X10.no.decenoate..19.1n9.                          | 1.01836  | 1.04753  |
| citrate                                            | 1.01799  | 0.696015 |
| spermidine                                         | 1.01662  | 0.643619 |
| S.methylcysteine                                   | 1.01469  | 0.947102 |
| X2.ketocaprylate                                   | 1.01425  | 0.691519 |
| X2.hydroxysebacate                                 | 1.01398  | 0.507922 |
| indoleacetylglutamine                              | 1.01391  | 0.555546 |
| citalopram.escitalopram(NA)                        | 1.01356  | 1.62554  |
| X.16.or.17..methylstearate..a19.0.or.i19.0.        | 1.01327  | 0.467137 |
| pimeloylcarnitine.3.methyladipoylcarnitine..C7.DC. | 1.00813  | 0.204658 |
| X4.vinylphenol.sulfate                             | 1.00586  | 0.373611 |
| X...21364                                          | 1.00458  | 0.427913 |
| X1.methyl.5.imidazoleacetate                       | 1.00326  | 0.459835 |
| X2.hydroxyhippurate..salicylurate.                 | 1.0012   | 0.283035 |
| hexadecadienoate..16.2n6.                          | 0.999559 | 1.55736  |
| X1..1.enyl.palmitoyl..2.oleoyl.GPC..P.16.O.18.1..  | 0.999299 | 1.17757  |
| N..2.furoyl.glycine                                | 0.998967 | 0.44572  |
| X...12729                                          | 0.997646 | 0.503171 |



|                                               |          |          |
|-----------------------------------------------|----------|----------|
| glycine                                       | 0.997486 | 0.663389 |
| androstenediol..3beta.17beta..monosulfate..1. | 0.997449 | 0.70069  |
| X...11858                                     | 0.995735 | 0.403248 |
| N.methylhydroxyproline..                      | 0.992385 | 0.677863 |
| tyrosine                                      | 0.991072 | 0.336573 |
| saccharin(NA)                                 | 0.989808 | 0.831763 |
| bilirubin..E.E..                              | 0.988005 | 0.508859 |
| N.acetylmethionine                            | 0.987049 | 0.892052 |
| X...16576                                     | 0.98698  | 0.743623 |
| sphinganine.1.phosphate                       | 0.98657  | 0.434048 |
| O.sulfo.L.tyrosine                            | 0.98555  | 0.445685 |
| dihomo.linoleate..20.2n6.                     | 0.981431 | 1.45757  |
| X1.stearoyl.2.oleoyl.GPS..18.0.18.1.          | 0.980394 | 0.734453 |
| gamma.glutamylglutamine                       | 0.979607 | 0.481361 |
| linoleate..18.2n6.                            | 0.97798  | 1.10901  |
| X...15486                                     | 0.977927 | 0.933737 |
| X...22771                                     | 0.976892 | 0.508202 |
| taurodeoxycholate                             | 0.976132 | 0.19516  |
| eicosenoate..20.1.                            | 0.974238 | 1.2034   |
| X1.palmitoylglycerol..16.0.                   | 0.972812 | 0.432413 |
| taurocholate                                  | 0.97268  | 0.37271  |
| tetradecanedioate..C14.DC.                    | 0.97264  | 0.413767 |
| X...25810                                     | 0.972508 | 0.661209 |
| X...12847                                     | 0.971781 | 0.451363 |
| isovalerylglycine                             | 0.970836 | 0.742992 |
| N.formylanthranilic.acid                      | 0.970447 | 0.562746 |
| sebacate..C10.DC.                             | 0.968135 | 0.450041 |
| X16.hydroxypalmitate                          | 0.966396 | 0.565138 |

|                                                   |          |          |
|---------------------------------------------------|----------|----------|
| N.acetyl.isoputreanine                            | 0.963231 | 0.847839 |
| X...21310                                         | 0.962424 | 0.278196 |
| cin.moyleglycine                                  | 0.961421 | 0.851535 |
| cis.4.decenoate..10.1n6..                         | 0.960308 | 1.35256  |
| X4.ethylcatechol.sulfate                          | 0.957362 | 0.691053 |
| thioprolin                                        | 0.956125 | 0.72712  |
| beta.citrylglutamate                              | 0.955608 | 0.602925 |
| ribulo.te.xylulo.te.lyxo.te.                      | 0.954826 | 0.816081 |
| X...24748                                         | 0.952572 | 0.620142 |
| N.acetylglutamate                                 | 0.952123 | 0.581916 |
| qui.te                                            | 0.950027 | 0.823839 |
| X...24522                                         | 0.949458 | 0.37848  |
| X1..1.enyl.palmitoyl..2.oleoyl.GPE..P.16.0.18.1.. | 0.948228 | 0.379011 |
| X...21834                                         | 0.94798  | 0.462899 |
| X...17367                                         | 0.94649  | 0.508406 |
| X...18899                                         | 0.946392 | 0.656029 |
| glycerophosphoinositol.                           | 0.946363 | 0.616697 |
| hydroxypioglitazone..M.IV.(NA)                    | 0.943951 | 1.27056  |
| ethyl.beta.glucopyranoside                        | 0.943121 | 0.823021 |
| taurochenodeoxycholate                            | 0.94293  | 0.341674 |
| X5.dodecenoate..12.1n7.                           | 0.941056 | 1.056    |
| X1.palmitoyl.2.linoleoyl.GPC..16.0.18.2.          | 0.939668 | 0.510278 |
| stearido.te..18.4n3.                              | 0.939394 | 0.351549 |
| X...24334                                         | 0.935978 | 0.439818 |
| X1.carboxyethyltyrosine                           | 0.935104 | 0.356234 |
| cholate                                           | 0.934635 | 0.569708 |
| X2.methoxyhydroquinone.sulfate..1.                | 0.934612 | 0.238189 |
| X3.hydroxybutyryltyrosine..                       | 0.933428 | 0.795384 |

|                                               |          |          |
|-----------------------------------------------|----------|----------|
| S.1.pyrroline.5.carboxylate                   | 0.932359 | 0.691505 |
| X...25503(NA)                                 | 0.930918 | 0.838561 |
| N6.N6.dimethyllysine                          | 0.929833 | 0.433867 |
| tetradecadienoate..14.2..                     | 0.929322 | 1.42677  |
| glycoursodeoxycholic.acid.sulfate..1.         | 0.929088 | 0.805185 |
| N.methylproline                               | 0.927193 | 0.756506 |
| galacto.te                                    | 0.925728 | 0.484079 |
| andro.steroid.monosulfate.C19H28O6S..1..      | 0.92376  | 0.821022 |
| oleate.vacce.te..18.1.                        | 0.923627 | 1.37871  |
| X4.hydroxychlorothalonil                      | 0.921902 | 0.564779 |
| X3.hydroxybutyrate..BHBA.                     | 0.921648 | 0.51991  |
| linoleoylcarnitine..C18.2..                   | 0.921583 | 0.450901 |
| beta.hydroxyisovalerate                       | 0.921026 | 0.53353  |
| delta.CEHC                                    | 0.920184 | 0.437499 |
| glycosyl.N.palmitoyl.sphingosine..d18.1.16.0. | 0.916299 | 0.7664   |
| X12.13.DiHOME                                 | 0.912747 | 0.387694 |
| X3.ureidopropio.te                            | 0.911368 | 0.447845 |
| X2.aminooctanoate                             | 0.908908 | 0.816227 |
| glycosyl.ceramide..d18.2.24.1..d18.1.24.2..   | 0.908011 | 0.740133 |
| perfluorooctanoate..PFOA.                     | 0.906032 | 0.744998 |
| dodecanedioate..C12.DC.                       | 0.905819 | 0.519512 |
| octadecanedioate..C18.DC.                     | 0.905427 | 0.496777 |
| X...16397                                     | 0.903586 | 0.97867  |
| X...12411                                     | 0.902871 | 0.369623 |
| betaine                                       | 0.902429 | 0.596555 |
| X...24328                                     | 0.901105 | 0.684653 |
| docosapentaenoate..n6.DPA..22.5n6.            | 0.900752 | 0.539417 |
| X1.oleoyl.GPS..18.1.                          | 0.900672 | 0.500315 |

|                                                |          |          |
|------------------------------------------------|----------|----------|
| X1.stearoyl.2.arachidonoyl.GPS..18.0.20.4.     | 0.900221 | 0.569421 |
| gamma.glutamyl.epsilon.lysine                  | 0.899505 | 0.518209 |
| docosadienoate..22.2n6.                        | 0.897631 | 1.23399  |
| ferulic.acid.4.sulfate                         | 0.89648  | 0.525493 |
| gamma.glutamyl.2.aminobutyrate                 | 0.895662 | 0.815149 |
| fructosyllsine                                 | 0.895383 | 0.572878 |
| topiramate(0.0376811)                          | 0.89377  | 2.31684  |
| metoprolol(0.124957)                           | 0.89377  | 2.31684  |
| ciprofloxacin(-0.270497)                       | 0.89377  | 2.31684  |
| saccharin(-0.0815355)                          | 0.89377  | 2.31684  |
| bradykinin..hydroxy.pro.3.(-0.646454)          | 0.89377  | 2.31684  |
| bradykinin..des.arg.9.(-1.21706)               | 0.89377  | 2.31684  |
| hydroxybupropion(0.619285)                     | 0.89377  | 2.31684  |
| pioglitazone(-0.164167)                        | 0.89377  | 2.31684  |
| Fibrinopeptide.A..phosphono.ser.3..(-0.545417) | 0.89377  | 2.31684  |
| HXGXA.(0.361861)                               | 0.89377  | 2.31684  |
| metoprolol.acid.metabolite.(-0.570399)         | 0.89377  | 2.31684  |
| lidocaine(1.19304)                             | 0.89377  | 2.31684  |
| carbamazepine(-0.0692429)                      | 0.89377  | 2.31684  |
| Nimesulide(-0.121264)                          | 0.89377  | 2.31684  |
| nornicotine(-0.0105555)                        | 0.89377  | 2.31684  |
| carbamazepine.glucuronide.(0.00229736)         | 0.89377  | 2.31684  |
| oxypurinol(0.0987588)                          | 0.89377  | 2.31684  |
| pseudoephedrine(0.357605)                      | 0.89377  | 2.31684  |
| quetiapine(-0.0792597)                         | 0.89377  | 2.31684  |
| doxycycline(-0.26579)                          | 0.89377  | 2.31684  |
| leucylglycine(0.116449)                        | 0.89377  | 2.31684  |
| mirtazapine(0.297806)                          | 0.89377  | 2.31684  |

|                                            |         |         |
|--------------------------------------------|---------|---------|
| verapamil(0.654198)                        | 0.89377 | 2.31684 |
| hydroxytioglitazone..M.IV.(0.278919)       | 0.89377 | 2.31684 |
| furosemide(-0.626798)                      | 0.89377 | 2.31684 |
| olmesartan(-0.621571)                      | 0.89377 | 2.31684 |
| daidzein.sulfate..2.(-0.294774)            | 0.89377 | 2.31684 |
| alpha.hydroxymetoprolol(-0.134446)         | 0.89377 | 2.31684 |
| rivaroxaban(-0.161578)                     | 0.89377 | 2.31684 |
| tadalafil(0.173701)                        | 0.89377 | 2.31684 |
| cetirizine(-0.0570996)                     | 0.89377 | 2.31684 |
| mycophenolic.acid.glucuronide(-0.0218367)  | 0.89377 | 2.31684 |
| sulfamethoxazole(-0.0881757)               | 0.89377 | 2.31684 |
| dexlansoprazole(0.525734)                  | 0.89377 | 2.31684 |
| metronidazole(-0.413699)                   | 0.89377 | 2.31684 |
| moxifloxacin(0.0724137)                    | 0.89377 | 2.31684 |
| fluco.zole(-0.106361)                      | 0.89377 | 2.31684 |
| THC.carboxylic.acid.glucuronide(-0.568102) | 0.89377 | 2.31684 |
| montelukast(-0.0573114)                    | 0.89377 | 2.31684 |
| midazolam(-1.54365)                        | 0.89377 | 2.31684 |
| tamoxifen(-1.17247)                        | 0.89377 | 2.31684 |
| Urolithin.B.glucuronide(0.0330479)         | 0.89377 | 2.31684 |
| Gliclazide(1.68938)                        | 0.89377 | 2.31684 |
| X...12407(-0.448164)                       | 0.89377 | 2.31684 |
| X...16649(-0.237242)                       | 0.89377 | 2.31684 |
| X...17348(-0.181402)                       | 0.89377 | 2.31684 |
| X...21315(0.0980337)                       | 0.89377 | 2.31684 |
| X...21842(0.28277)                         | 0.89377 | 2.31684 |
| X...24576(0.341957)                        | 0.89377 | 2.31684 |
| X...25503(-0.147804)                       | 0.89377 | 2.31684 |

|                                                         |          |          |
|---------------------------------------------------------|----------|----------|
| X...25523(0.0615654)                                    | 0.89377  | 2.31684  |
| caprylate..8.0.                                         | 0.89374  | 0.741972 |
| X...12101                                               | 0.891608 | 0.867898 |
| indolin.2.one                                           | 0.890285 | 0.344855 |
| X1..1.enyl.palmitoyl..2.palmitoleoyl.GPC..P.16.0.16.1.. | 0.887809 | 0.873161 |
| X...12680                                               | 0.884705 | 0.804626 |
| asparagine                                              | 0.884633 | 0.452276 |
| X...21829                                               | 0.883149 | 1.17562  |
| X4.hydroxyhippurate                                     | 0.882294 | 0.371843 |
| X3.methylglutaco.te                                     | 0.882016 | 0.889943 |
| X...19141                                               | 0.879902 | 0.307459 |
| X5.HETE                                                 | 0.879766 | 1.0435   |
| X...13007                                               | 0.879634 | 0.39974  |
| X...17357                                               | 0.878035 | 0.678634 |
| X6.bromotryptophan                                      | 0.877945 | 0.344745 |
| palmitoleate..16.1n7.                                   | 0.875394 | 1.41128  |
| glycohyocholate                                         | 0.874944 | 0.374331 |
| gamma.tocopherol.beta.tocopherol                        | 0.874349 | 0.639117 |
| N6.methyllysine                                         | 0.87407  | 0.501158 |
| orotidine                                               | 0.872981 | 0.393609 |
| sphingosine                                             | 0.872682 | 1.06155  |
| dehydroepiandrosterone.sulfate..DHEA.S.                 | 0.872398 | 0.573126 |
| X3.methylcytidine                                       | 0.872121 | 0.242547 |
| N6.succinyladenosine                                    | 0.870545 | 0.733477 |
| pyridoxate                                              | 0.870147 | 0.601305 |
| gluco.te                                                | 0.869165 | 1.01599  |
| pyrraline                                               | 0.868579 | 0.465818 |
| X5alpha.androstan.3alpha.17alpha.diol.monosulfate       | 0.865413 | 0.63019  |

|                                                                     |          |          |
|---------------------------------------------------------------------|----------|----------|
| X3beta.7alpha.dihydroxy.5.cholestenoate                             | 0.864064 | 0.50613  |
| corticosterone                                                      | 0.863326 | 0.340329 |
| X...17185                                                           | 0.86282  | 0.607155 |
| taurodeoxycholic.acid.3.sulfate                                     | 0.860923 | 0.355983 |
| X...15728                                                           | 0.859021 | 0.387958 |
| tadalafil(NA)                                                       | 0.858455 | 1.15385  |
| decadienedioic.acid..C10.2.DC...                                    | 0.858024 | 0.793415 |
| X11.ketoetiocholanolone.glucuronide                                 | 0.855907 | 0.489368 |
| methionine                                                          | 0.855148 | 0.401861 |
| X6.hydroxywarfarin(NA)                                              | 0.853845 | 1.65636  |
| X...25520                                                           | 0.85089  | 0.408085 |
| imidazole.propio.te                                                 | 0.847789 | 0.350688 |
| X3.hydroxyhexanoate                                                 | 0.847644 | 0.934738 |
| histidine                                                           | 0.845078 | 0.372042 |
| X...24425                                                           | 0.844257 | 0.666398 |
| linole.te..alpha.or.gamma...18.3n3.or.6..                           | 0.844077 | 1.21172  |
| X3.hydroxyhippurate                                                 | 0.844068 | 0.315886 |
| X...21286                                                           | 0.843474 | 0.718988 |
| hydroquinone.sulfate                                                | 0.843411 | 0.372498 |
| branched.chain..straight.chain..or.cyclopropyl.10.1.fatty.acid..1.. | 0.843246 | 0.854833 |
| X4.chlorobenzoic.acid                                               | 0.842837 | 0.300633 |
| androsterone.glucuronide                                            | 0.841311 | 0.358879 |
| X...11407                                                           | 0.840843 | 0.551597 |
| mannitol.sorbitol                                                   | 0.840764 | 0.7299   |
| bradykinin(0.118316)                                                | 0.840606 | 2.35589  |
| bradykinin..des.arg.9.(0.324544)                                    | 0.840606 | 2.35589  |
| Fibrinopeptide.A.(-0.310882)                                        | 0.840606 | 2.35589  |

|                                                      |          |          |
|------------------------------------------------------|----------|----------|
| HXGXA.(-0.670017)                                    | 0.840606 | 2.35589  |
| X2.methoxyacetaminophen.sulfate.(0.170924)           | 0.840606 | 2.35589  |
| diphenhydramine(1.57516)                             | 0.840606 | 2.35589  |
| pseudoephedrine(0.640326)                            | 0.840606 | 2.35589  |
| X2.hydroxyibuprofen(-1.7464)                         | 0.840606 | 2.35589  |
| carboxyibuprofen(-2.62141)                           | 0.840606 | 2.35589  |
| X...17348(-1.72541)                                  | 0.840606 | 2.35589  |
| X1..1.enyl.palmitoyl..2.linoleoyl.GPE..P.16.0.18.2.. | 0.838853 | 0.563997 |
| N2.acetyllysine                                      | 0.836705 | 0.391991 |
| X3.methyl.catechol.sulfate..1.                       | 0.834236 | 0.402042 |
| heptenedioate..C7.1.DC..                             | 0.833547 | 0.615434 |
| glutaryl carnitine..C5.DC.                           | 0.833245 | 0.335291 |
| X.14.or.15..methylpalmitate..a17.0.or.i17.0.         | 0.833127 | 0.944155 |
| X3.methylxanthine                                    | 0.833054 | 0.304932 |
| taurochenodeoxycholic.acid.3.sulfate                 | 0.82769  | 0.40595  |
| X2.aminobutyrate                                     | 0.826679 | 0.554552 |
| X...11849                                            | 0.824886 | 0.431836 |
| X3b.hydroxy.5.cholenoic.acid                         | 0.822745 | 0.500277 |
| X...18838                                            | 0.821844 | 0.485412 |
| X3.phenylpropio.te..hydrocin.mate.                   | 0.821149 | 0.680232 |
| glycodeoxycholate                                    | 0.819924 | 0.351413 |
| X...12216                                            | 0.819416 | 0.344862 |
| X...21353                                            | 0.818157 | 1.44448  |
| X...25419                                            | 0.818031 | 0.506461 |
| X...11795                                            | 0.816315 | 0.648744 |
| glyco.beta.muricholate..                             | 0.815404 | 0.699034 |
| heptanoate..7.0.                                     | 0.814621 | 0.692451 |
| X1..1.enyl.palmitoyl..2.linoleoyl.GPC..P.16.0.18.2.. | 0.814312 | 1.28522  |



|                                              |          |          |
|----------------------------------------------|----------|----------|
| pentadecanoate..15.0.                        | 0.814128 | 0.969789 |
| orotate                                      | 0.812904 | 0.66883  |
| fructose                                     | 0.811939 | 0.738125 |
| desmethylocitalopram.(NA)                    | 0.81141  | 1.14649  |
| bradykinin..des.arg.9.(NA)                   | 0.811024 | 0.707025 |
| X.2.or.3..decenoate..10.1n7.or.n8.           | 0.810663 | 0.838598 |
| X5.oxoproline                                | 0.808341 | 0.685898 |
| homovanillate..HVA.                          | 0.808323 | 0.458619 |
| cis.4.decenoylcarnitine..C10.1.              | 0.808136 | 1.13596  |
| X3beta.hydroxy.5.cholestenoate               | 0.805963 | 0.326464 |
| cystine                                      | 0.805878 | 0.41843  |
| arginine                                     | 0.805704 | 0.633728 |
| bradykinin(1.41932)                          | 0.804415 | 2.25668  |
| bradykinin..hydroxy.pro.3.(-0.124883)        | 0.804415 | 2.25668  |
| bradykinin..des.arg.9.(0.903894)             | 0.804415 | 2.25668  |
| Fibrinopeptide.A.(2.90452)                   | 0.804415 | 2.25668  |
| Fibrinopeptide.A..des.ala.1..(2.11233)       | 0.804415 | 2.25668  |
| Fibrinopeptide.A..phosphono.ser.3..(1.01606) | 0.804415 | 2.25668  |
| HXGXA.(1.29815)                              | 0.804415 | 2.25668  |
| citalopram.escitalopram(-0.554081)           | 0.804415 | 2.25668  |
| histidylalanine(-0.170788)                   | 0.804415 | 2.25668  |
| desmethylocitalopram.(-0.262014)             | 0.804415 | 2.25668  |
| citalopram.propio.te.(-1.20631)              | 0.804415 | 2.25668  |
| Fibrinopeptide.B..1.13...(1.74379)           | 0.804415 | 2.25668  |
| X...25503(1.49669)                           | 0.804415 | 2.25668  |
| X2.hydroxybutyrate.2.hydroxyisobutyrate      | 0.803664 | 0.692983 |
| X10.heptadecenoate..17.1n7.                  | 0.802943 | 1.39742  |
| X...12849                                    | 0.802487 | 0.335142 |

|                                         |          |          |
|-----------------------------------------|----------|----------|
| X...12283                               | 0.801553 | 0.390534 |
| X1.stearoyl.2.linoleoyl.GPI..18.0.18.2. | 0.799485 | 0.668377 |
| dihomo.linolenoyl.choline               | 0.798047 | 0.438063 |
| X...11444                               | 0.798038 | 0.708028 |
| arachidonoylcholine                     | 0.795629 | 0.829543 |
| dihydroferulate                         | 0.794246 | 0.391638 |
| cysteine.glutathione.disulfide          | 0.79174  | 0.64192  |
| glucuronide.of.C10H18O2..7..            | 0.789158 | 0.390442 |
| X1.methylnicoti.mide                    | 0.788902 | 0.831037 |
| hypoxanthine                            | 0.788812 | 0.693465 |
| X...13728                               | 0.788483 | 0.46764  |
| N6.carboxymethyllysine                  | 0.78769  | 0.412006 |
| lidocaine(NA)                           | 0.787001 | 0.608615 |
| theanine                                | 0.78621  | 0.462193 |
| X...12026                               | 0.785854 | 0.652839 |
| X5.dodecenoylcarnitine..C12.1.          | 0.784009 | 0.443399 |
| X...21607                               | 0.783144 | 1.02726  |
| cotinine                                | 0.7823   | 0.486873 |
| lanthionine                             | 0.78201  | 0.573748 |
| androsterone.sulfate                    | 0.78185  | 0.453534 |
| X...21851                               | 0.780752 | 0.355312 |
| glucuronide.of.C12H22O4..1..            | 0.779842 | 0.436311 |
| X1.palmitoyl.GPA..16.0.                 | 0.779122 | 0.732938 |
| X...21383                               | 0.778442 | 0.391197 |
| butyrate.isobutyrate..4.0.              | 0.777505 | 0.333953 |
| X...23780                               | 0.776832 | 0.329468 |
| X...24947                               | 0.776351 | 0.503928 |
| thymol.sulfate                          | 0.776065 | 0.441909 |

|                                            |          |          |
|--------------------------------------------|----------|----------|
| X3.hydroxydecanoate                        | 0.774868 | 1.46828  |
| myristoleate..14.1n5.                      | 0.773806 | 1.24855  |
| X...21342                                  | 0.773394 | 0.514534 |
| X3.hydroxyhippurate.sulfate                | 0.772016 | 0.253191 |
| epiandrosterone.sulfate                    | 0.771304 | 0.329944 |
| X...14904                                  | 0.769792 | 0.352139 |
| oxypurinol(-2.62417)                       | 0.769513 | 1.82839  |
| mycophenolic.acid(-1.98777)                | 0.769513 | 1.82839  |
| meloxicam(-3.94248)                        | 0.769513 | 1.82839  |
| saccharin(-0.366292)                       | 0.768034 | 2.40921  |
| Fibrinopeptide.A..des.ala.1..(-0.672561)   | 0.768034 | 2.40921  |
| X2.methoxyacetaminophen.sulfate.(-1.06857) | 0.768034 | 2.40921  |
| pantoprazole(-0.0230639)                   | 0.768034 | 2.40921  |
| X2.hydroxyibuprofen(-0.27194)              | 0.768034 | 2.40921  |
| furosemide(0.211638)                       | 0.768034 | 2.40921  |
| o.hydroxyatorvastatin(0)                   | 0.768034 | 2.40921  |
| valsartan(0.0617534)                       | 0.768034 | 2.40921  |
| sitagliptin(-0.0646452)                    | 0.768034 | 2.40921  |
| phenylacetylmethionine(0.209369)           | 0.768034 | 2.40921  |
| levetiracetam(2.01434)                     | 0.768034 | 2.40921  |
| THC.carboxylic.acid(-0.058795)             | 0.768034 | 2.40921  |
| X...17348(1.39723)                         | 0.768034 | 2.40921  |
| X...21315(0.0138043)                       | 0.768034 | 2.40921  |
| X...21467                                  | 0.767259 | 0.673267 |
| X16a.hydroxy.DHEA.3.sulfate                | 0.765783 | 0.715687 |
| X...25420                                  | 0.764763 | 0.63072  |
| X7.methylxanthine                          | 0.759519 | 0.31757  |
| N.acetylserine                             | 0.759395 | 0.564559 |

|                                                      |          |          |
|------------------------------------------------------|----------|----------|
| X...11847                                            | 0.7577   | 0.148139 |
| glutamine                                            | 0.757633 | 0.853051 |
| X...21315(NA)                                        | 0.755207 | 0.69378  |
| N.acetylalliin                                       | 0.755143 | 0.484612 |
| resveratrol.disulfate..1..(NA)                       | 0.753128 | 0.494281 |
| X9.10.DiHOME                                         | 0.751573 | 0.571602 |
| gamma.CEHC                                           | 0.750627 | 0.722777 |
| creatine                                             | 0.750535 | 0.917614 |
| benzoate                                             | 0.749867 | 0.812162 |
| X...21821                                            | 0.749322 | 0.629686 |
| daidzein.sulfate..2..(NA)                            | 0.748305 | 0.773433 |
| Fibrinopeptide.A..phosphono.ser.3..(NA)              | 0.746303 | 1.12331  |
| X1ate                                                | 0.745535 | 0.55099  |
| N.formylphenylalanine                                | 0.742766 | 0.503696 |
| adre.te..22.4n6.                                     | 0.74141  | 0.819292 |
| X5alpha.androstan.3alpha.17beta.diol.17.glucuronide  | 0.741398 | 0.297212 |
| X...25523(NA)                                        | 0.739148 | 0.773581 |
| X...24669                                            | 0.737339 | 0.486881 |
| X...12007                                            | 0.736693 | 0.515163 |
| imidazole.lactate                                    | 0.736392 | 0.405952 |
| X...18886                                            | 0.731209 | 0.385529 |
| taurochole.te.sulfate.                               | 0.727897 | 0.609352 |
| decanoylcarnitine..C10.                              | 0.727053 | 0.805169 |
| cytidine                                             | 0.726648 | 0.977723 |
| X5alpha.androstan.3alpha.17beta.diol.monosulfate..2. | 0.72644  | 0.389184 |
| ursodeoxycholate                                     | 0.725647 | 0.402756 |
| X...24307                                            | 0.723019 | 0.501682 |
| oleoylcholine                                        | 0.721715 | 0.61475  |

|                                                      |          |          |
|------------------------------------------------------|----------|----------|
| tryptophan.betaine                                   | 0.721134 | 0.166024 |
| alpha.ketobutyrate                                   | 0.719923 | 0.432588 |
| ectoine                                              | 0.718846 | 0.440342 |
| HWESASXX.                                            | 0.718134 | 0.310456 |
| tauroolithocholate.3.sulfate                         | 0.716993 | 0.461617 |
| caprate..10.0.                                       | 0.716816 | 0.617075 |
| glutamine.conjugate.of.C6H10O2..2..                  | 0.716721 | 0.924226 |
| heme                                                 | 0.71612  | 0.307274 |
| metoprolol.acid.metabolite.(-1.46837)                | 0.713258 | 1.85248  |
| X2.methoxyacetaminophen.sulfate.(-2.1211)            | 0.713258 | 1.85248  |
| diphenhydramine(-0.104916)                           | 0.713258 | 1.85248  |
| celecoxib(-0.96312)                                  | 0.713258 | 1.85248  |
| valsartan(-3.37553)                                  | 0.713258 | 1.85248  |
| diclofe.c(-0.616371)                                 | 0.713258 | 1.85248  |
| X5alpha.androstan.3beta.17beta.diol.monosulfate..2.  | 0.711641 | 0.46882  |
| gamma.glutamylthreonine                              | 0.710721 | 0.391266 |
| caproate..6.0.                                       | 0.710355 | 1.11899  |
| S.allylcysteine                                      | 0.709827 | 0.550294 |
| indole.3.carboxylate                                 | 0.708935 | 0.560901 |
| phenylacetylmethionine(NA)                           | 0.702581 | 0.531566 |
| X3.hydroxyoctanoate                                  | 0.702357 | 1.5991   |
| cysteine.sulfinic.acid                               | 0.700075 | 0.409867 |
| N.acetyl.beta.alanine                                | 0.699774 | 0.447791 |
| myristoleoylcarnitine..C14.1..                       | 0.699222 | 0.892637 |
| undecanedioate..C11.DC.                              | 0.697119 | 0.727455 |
| N.acetylhistidine                                    | 0.696669 | 0.387737 |
| X5alpha.androstan.3beta.17alpha.diol.disulfate       | 0.696516 | 0.470923 |
| X5alpha.androstan.3alpha.17beta.diol.monosulfate..1. | 0.695377 | 0.432212 |

|                                                   |          |          |
|---------------------------------------------------|----------|----------|
| bradykinin(0.2714)                                | 0.691713 | 1.62323  |
| nornicotine(0.631059)                             | 0.691713 | 1.62323  |
| metoprolol.acid.metabolite.(0.74517)              | 0.690997 | 2.1146   |
| lidocaine(0.270638)                               | 0.690997 | 2.1146   |
| X2.methoxyacetaminophen.sulfate.(0)               | 0.690997 | 2.1146   |
| oxypurinol(1.83082)                               | 0.690997 | 2.1146   |
| atenolol(-0.245901)                               | 0.690997 | 2.1146   |
| ranitidine(0.26559)                               | 0.690997 | 2.1146   |
| pseudoephedrine(0.880664)                         | 0.690997 | 2.1146   |
| tramadol(-0.0213258)                              | 0.690997 | 2.1146   |
| O.desmethyltramadol.glucuronide(-0.24475)         | 0.690997 | 2.1146   |
| alpha.hydroxymetoprolol(0.323893)                 | 0.690997 | 2.1146   |
| Urolithin.B.glucuronide(-0.679639)                | 0.690997 | 2.1146   |
| Gliclazide(0)                                     | 0.690997 | 2.1146   |
| X...12407(0)                                      | 0.690997 | 2.1146   |
| palmitoylcholine                                  | 0.690963 | 0.805857 |
| X...23644                                         | 0.688971 | 0.697234 |
| nornicotine(NA)                                   | 0.688327 | 0.84646  |
| norfluoxetine(NA)                                 | 0.685975 | 1.49628  |
| glucuronide.of.piperine.metabolite.C17H21NO3..4.. | 0.685582 | 0.682202 |
| phenylacetylglutamine                             | 0.684546 | 0.935149 |
| carboxyethyl.GABA                                 | 0.68364  | 0.46951  |
| tyramine.O.sulfate                                | 0.679378 | 0.58179  |
| ribitol                                           | 0.678295 | 0.699389 |
| N.acetyl.aspartyl.glutamate...AG.                 | 0.675247 | 0.180847 |
| O.desmethyltramadol.glucuronide(NA)               | 0.675037 | 1.2542   |
| X...16938                                         | 0.674882 | 0.555538 |
| sulfate.of.piperine.metabolite.C18H21NO3..3..     | 0.674171 | 0.34574  |

|                                                |          |          |
|------------------------------------------------|----------|----------|
| X2.3.dihydroxyisovalerate                      | 0.671997 | 0.801624 |
| dodecenedioate..C12.1.DC..                     | 0.67194  | 0.747363 |
| X...13507                                      | 0.667776 | 0.642026 |
| X...24309                                      | 0.665059 | 0.281396 |
| lactate                                        | 0.663064 | 0.475204 |
| gamma.glutamylglycine                          | 0.662757 | 0.517223 |
| tetradecadienedioate..C14.2.DC..               | 0.661175 | 0.78427  |
| salicylate                                     | 0.659937 | 0.271097 |
| malate                                         | 0.659544 | 0.545172 |
| X2..O.methylcytidine                           | 0.655207 | 0.503239 |
| N2.acetyl.N6.N6.dimethyllysine                 | 0.65415  | 0.439083 |
| X.N.1....N.8...acetylspermidine                | 0.653892 | 0.605065 |
| Fibrinopeptide.A.(-0.271153)                   | 0.653549 | 1.68345  |
| Fibrinopeptide.A..des.ala.1..(0)               | 0.653549 | 1.68345  |
| Fibrinopeptide.A..phosphono.ser.3..(-0.340661) | 0.653549 | 1.68345  |
| X2.methoxyacetaminophen.sulfate.(-2.63109)     | 0.653549 | 1.68345  |
| bradykinin(0.0746435)                          | 0.653013 | 1.63121  |
| bradykinin..des.arg.9.(0.361304)               | 0.653013 | 1.63121  |
| citalopram.escitalopram(-1.05814)              | 0.653013 | 1.63121  |
| resveratrol.disulfate..1..(-0.50038)           | 0.653013 | 1.63121  |
| citalopram.propio.te.(-0.668064)               | 0.653013 | 1.63121  |
| X...16649(0.263056)                            | 0.653013 | 1.63121  |
| X...12812                                      | 0.652709 | 0.302889 |
| threonine                                      | 0.651246 | 0.567158 |
| propionylglycine                               | 0.649514 | 0.473473 |
| X2..deoxyuridine                               | 0.649065 | 0.384351 |
| azelate..C9.DC.                                | 0.647685 | 0.471694 |
| X2.aminophenol.sulfate                         | 0.646214 | 0.351177 |

|                                 |          |          |
|---------------------------------|----------|----------|
| theobromine                     | 0.646089 | 0.5344   |
| fluoxetine(NA)                  | 0.645445 | 1.27071  |
| X...24243                       | 0.643738 | 0.360054 |
| X...21661                       | 0.641858 | 0.413608 |
| phenylacetate                   | 0.637751 | 0.676869 |
| glutarate..C5.DC.               | 0.637153 | 1.12689  |
| uridine                         | 0.636211 | 0.723086 |
| X...17690                       | 0.635584 | 0.519438 |
| N.acetyltaurine                 | 0.63556  | 0.424257 |
| X5.6.dihydrothymine             | 0.635509 | 0.275281 |
| X...18922                       | 0.63538  | 0.996199 |
| suberate..C8.DC.                | 0.633051 | 0.638188 |
| beta.alanine                    | 0.631582 | 0.342614 |
| succi.te                        | 0.630313 | 0.675989 |
| X...12707                       | 0.629694 | 0.419623 |
| X...11470                       | 0.627814 | 0.435981 |
| X...16649(NA)                   | 0.627273 | 0.642434 |
| X...21796                       | 0.625615 | 0.577426 |
| succinimide                     | 0.625103 | 0.328573 |
| X8.hydroxyoctanoate             | 0.624917 | 0.528711 |
| desmethylocitalopram.(0)        | 0.624411 | 1.48976  |
| citalopram.propio.te.(0.149023) | 0.624411 | 1.48976  |
| indolepropio.te                 | 0.622564 | 0.509247 |
| histidylalanine(NA)             | 0.621519 | 0.551129 |
| N.carbamoylalanine              | 0.62042  | 0.3022   |
| tetrahydrocortisol.sulfate..1.  | 0.618771 | 0.538356 |
| cholic.acid.glucuronide         | 0.616507 | 0.492361 |
| X4.hydroxycoumarin              | 0.615989 | 0.774316 |



|                                     |          |          |
|-------------------------------------|----------|----------|
| N.acetylaspartate...A.              | 0.612968 | 0.353112 |
| acisoga                             | 0.612892 | 0.763894 |
| oxypurinol(NA)                      | 0.612778 | 0.598741 |
| bradykinin..hydroxy.pro.3.(NA)      | 0.612626 | 0.719738 |
| N.N.dimethyl.5.aminovalerate        | 0.606552 | 0.421102 |
| myristate..14.0.                    | 0.60469  | 1.45596  |
| vanillic.acid.glycine               | 0.603233 | 0.602359 |
| octanoylcarnitine..C8.              | 0.602986 | 1.04503  |
| X5.hydroxylysine                    | 0.601499 | 0.382065 |
| X1.linoleoyl.GPA..18.2..            | 0.599668 | 0.550328 |
| X...12127                           | 0.597165 | 0.407336 |
| sucrose                             | 0.595603 | 0.863789 |
| X2.aminoheptanoate                  | 0.594281 | 0.84023  |
| X3.methylhistidine                  | 0.592955 | 0.434146 |
| glycolithocholate.sulfate.          | 0.592632 | 0.328924 |
| deoxycholic.acid.12.sulfate.        | 0.591522 | 0.435539 |
| beta.sitosterol                     | 0.589743 | 0.554599 |
| X...24747                           | 0.588936 | 0.295939 |
| nornicotine(0)                      | 0.588727 | 1.43417  |
| phenol.sulfate                      | 0.586883 | 0.209516 |
| Gliclazide(NA)                      | 0.586797 | 0.430188 |
| glycerol                            | 0.585928 | 0.789096 |
| X1.arachidonoyl.GPA..20.4.          | 0.584935 | 0.445318 |
| phosphate                           | 0.582845 | 0.407727 |
| tramadol(NA)                        | 0.580027 | 1.19393  |
| methylsuccinate                     | 0.571447 | 0.345111 |
| thyroxine                           | 0.569225 | 0.371633 |
| glutamine.conjugate.of.C6H10O2..1.. | 0.567009 | 0.782645 |

|                                            |          |          |
|--------------------------------------------|----------|----------|
| nornicotine(0.457805)                      | 0.566773 | 1.37144  |
| doxycycline(0)                             | 0.566773 | 1.37144  |
| sulfamethoxazole(0.692997)                 | 0.566773 | 1.37144  |
| N4.acetylsulfamethoxazole.(0)              | 0.566773 | 1.37144  |
| N4.acetylsulfamethoxazole.(NA)             | 0.566773 | 1.37144  |
| N4.acetyl.5.hydroxysulfamethoxazole.(0)    | 0.566773 | 1.37144  |
| X...21315(2.10457)                         | 0.566773 | 1.37144  |
| atenolol(NA)                               | 0.566634 | 0.810402 |
| X...18901                                  | 0.564143 | 0.325314 |
| X9.hydroxystearate                         | 0.563591 | 0.87711  |
| phenolphthalein.beta.D.glucuronide(NA)     | 0.561879 | 0.513227 |
| dihydrocaffeate.sulfate..2.                | 0.560601 | 0.313373 |
| guanidinoacetate                           | 0.559474 | 0.902393 |
| N2.acetyl.N6.methyllysine                  | 0.553317 | 0.595272 |
| isoursodeoxycholate                        | 0.551576 | 0.827066 |
| metronidazole(0)                           | 0.54864  | 0.34303  |
| X2.methoxyacetaminophen.sulfate.(-2.11279) | 0.547996 | 1.41074  |
| oxypurinol(0.541277)                       | 0.547996 | 1.41074  |
| daidzein.sulfate..2.(1.22914)              | 0.547996 | 1.41074  |
| tadalafil(0.00458945)                      | 0.547996 | 1.41074  |
| resveratrol.disulfate..1..(-0.173996)      | 0.547996 | 1.41074  |
| X2.methoxyacetaminophen.sulfate.(-0.53273) | 0.547308 | 1.37359  |
| X2.hydroxyibuprofen(-0.239654)             | 0.547308 | 1.37359  |
| carboxyibuprofen(-0.339677)                | 0.547308 | 1.37359  |
| tadalafil(1.12142)                         | 0.547308 | 1.37359  |
| cetirizine(2.07481)                        | 0.547308 | 1.37359  |
| meloxicam(-0.434945)                       | 0.547308 | 1.37359  |
| Gliclazide(0.987643)                       | 0.547308 | 1.37359  |

|                                            |          |          |
|--------------------------------------------|----------|----------|
| X...16649(-1.31677)                        | 0.547308 | 1.37359  |
| X...25523(0.312326)                        | 0.547308 | 1.37359  |
| THC.carboxylic.acid(NA)                    | 0.546703 | 0.738056 |
| X...11299                                  | 0.546335 | 0.872428 |
| pantoate                                   | 0.545395 | 0.277998 |
| X...12013                                  | 0.540517 | 0.429762 |
| X...25422                                  | 0.539634 | 0.404797 |
| dibutyl.sulfosucci.te                      | 0.539253 | 0.319996 |
| fumarate                                   | 0.538522 | 0.677118 |
| .proxen(NA)                                | 0.538437 | 0.486782 |
| saccharin(-1.46968)                        | 0.536324 | 1.22482  |
| pioglitazone(-2.33408)                     | 0.536324 | 1.22482  |
| oxypurinol(0.442697)                       | 0.536324 | 1.22482  |
| hydroxypioglitazone..M.IV.(-2.02193)       | 0.536324 | 1.22482  |
| X...21842(-0.187294)                       | 0.536324 | 1.22482  |
| X...17655                                  | 0.535089 | 0.428085 |
| nornicotine(-0.0112632)                    | 0.534915 | 1.23813  |
| X...17348(-1.041)                          | 0.534915 | 1.23813  |
| X2.methoxyacetaminophen.sulfate.(-1.75215) | 0.533376 | 1.42144  |
| oxypurinol(-5.99146)                       | 0.533376 | 1.42144  |
| phenylacetylmethionine(-0.0678507)         | 0.533376 | 1.42144  |
| dexlansoprazole(2.19185)                   | 0.533376 | 1.42144  |
| meloxicam(2.73568)                         | 0.533376 | 1.42144  |
| Gliclazide(0.799397)                       | 0.533376 | 1.42144  |
| X...16649(1.37985)                         | 0.533376 | 1.42144  |
| X...17348(-0.609174)                       | 0.533376 | 1.42144  |
| inosine                                    | 0.532545 | 0.463127 |
| X...25265                                  | 0.532239 | 0.572202 |

|                                             |          |          |
|---------------------------------------------|----------|----------|
| X4.methylguaiacol.sulfate                   | 0.531215 | 0.230149 |
| bradykinin(-0.0215301)                      | 0.527917 | 1.2762   |
| bradykinin..hydroxy.pro.3.(-0.15059)        | 0.527917 | 1.2762   |
| bradykinin..des.arg.9.(-0.20016)            | 0.527917 | 1.2762   |
| X...16649(-0.380382)                        | 0.527917 | 1.2762   |
| X...21315(3.39949)                          | 0.527917 | 1.2762   |
| X...25523(0.753678)                         | 0.527917 | 1.2762   |
| X...15220                                   | 0.525867 | 0.211556 |
| ranitidine(NA)                              | 0.525142 | 0.527186 |
| N.N.dimethylalanine                         | 0.523191 | 0.731612 |
| X...15461                                   | 0.522815 | 0.555941 |
| metoprolol.acid.metabolite.(0.248031)       | 0.522649 | 1.51376  |
| lidocaine(-0.199793)                        | 0.522649 | 1.51376  |
| oxypurinol(-0.245389)                       | 0.522649 | 1.51376  |
| atenolol(0.535499)                          | 0.522649 | 1.51376  |
| pseudoephedrine(-0.543005)                  | 0.522649 | 1.51376  |
| tramadol(-0.185246)                         | 0.522649 | 1.51376  |
| O.desmethyltramadol.glucuronide(-0.133531)  | 0.522649 | 1.51376  |
| X...25503(0.719205)                         | 0.522649 | 1.51376  |
| X...12851                                   | 0.521879 | 0.395391 |
| X...21842(2.09765)                          | 0.52047  | 1.22684  |
| X...25523(-1.78797)                         | 0.52047  | 1.22684  |
| phenolphthalein.beta.D.glucuronide(-5.9145) | 0.520022 | 1.20382  |
| Fibrinopeptide.A..des.ala.1..(0.000699755)  | 0.520022 | 1.20382  |
| pseudoephedrine(-0.530688)                  | 0.520022 | 1.20382  |
| furosemide(-0.977103)                       | 0.520022 | 1.20382  |
| meloxicam(-0.0619818)                       | 0.520022 | 1.20382  |
| Fibrinopeptide.B..1.13...(-1.68255)         | 0.520022 | 1.20382  |

|                                               |          |          |
|-----------------------------------------------|----------|----------|
| Gliclazide(0.722997)                          | 0.520022 | 1.20382  |
| gamma.carboxyglutamate                        | 0.516849 | 0.362927 |
| bradykinin(NA)                                | 0.51584  | 0.747033 |
| alpha.hydroxycaproate                         | 0.51401  | 0.556722 |
| saccharin(-0.598929)                          | 0.512083 | 1.24481  |
| metoprolol.acid.metabolite.(-0.0598562)       | 0.512083 | 1.24481  |
| oxypurinol(5.17396)                           | 0.512083 | 1.24481  |
| atenolol(1.10333)                             | 0.512083 | 1.24481  |
| ranitidine(-1.18613)                          | 0.512083 | 1.24481  |
| mycophenolic.acid(0)                          | 0.512083 | 1.24481  |
| mycophenolic.acid.glucuronide(0)              | 0.512083 | 1.24481  |
| resveratrol.disulfate..1..(0.313277)          | 0.512083 | 1.24481  |
| ranitidine.N.oxide.(-0.760998)                | 0.512083 | 1.24481  |
| X...17348(-0.629609)                          | 0.512083 | 1.24481  |
| pantoprazole(NA)                              | 0.511724 | 0.79709  |
| levetiracetam(0.0658814)                      | 0.504567 | 1.19614  |
| X...21842(-0.398688)                          | 0.504567 | 1.19614  |
| X...25523(-1.04412)                           | 0.504567 | 1.19614  |
| X2.methoxyacetaminophen.sulfate.(-0.919546)   | 0.499503 | 1.25566  |
| X...21315(-0.370919)                          | 0.499503 | 1.25566  |
| palmitoleoylcarnitine..C16.1..                | 0.49946  | 0.372576 |
| androstenediol..3beta.17beta..monosulfate..2. | 0.499328 | 0.384976 |
| daidzein.sulfate..2.(1.66744)                 | 0.498014 | 1.20211  |
| resveratrol.disulfate..1..(-0.621943)         | 0.498014 | 1.20211  |
| meloxicam(0.32027)                            | 0.498014 | 1.20211  |
| Gliclazide(-0.232941)                         | 0.498014 | 1.20211  |
| X...12407(-0.12613)                           | 0.498014 | 1.20211  |
| X...16649(-0.263835)                          | 0.498014 | 1.20211  |

|                                             |          |          |
|---------------------------------------------|----------|----------|
| X...17348(-0.434636)                        | 0.498014 | 1.20211  |
| X...21842(0.179233)                         | 0.498014 | 1.20211  |
| X...25503(-0.544727)                        | 0.498014 | 1.20211  |
| X...25523(-1.41511)                         | 0.498014 | 1.20211  |
| etiocholanolone.glucuronide                 | 0.496311 | 0.381128 |
| X...22520                                   | 0.494875 | 0.500784 |
| metoprolol.acid.metabolite.(NA)             | 0.493589 | 1.27232  |
| p.cresol.glucuronide.                       | 0.490458 | 0.682161 |
| THC.carboxylic.acid.glucuronide(0)          | 0.488733 | 0.534518 |
| cytosine                                    | 0.488166 | 0.301062 |
| glycolithocholate                           | 0.487936 | 0.248904 |
| X2.methoxyacetaminophen.sulfate.(-0.660874) | 0.485991 | 1.11747  |
| X...21842(0.284502)                         | 0.485991 | 1.11747  |
| .proxen(-0.213317)                          | 0.485858 | 1.11689  |
| X...17348(1.297)                            | 0.485858 | 1.11689  |
| levetiracetam(NA)                           | 0.483431 | 0.329806 |
| tadalafil(3.102)                            | 0.483227 | 1.27721  |
| THC.carboxylic.acid(-1.68902)               | 0.483227 | 1.27721  |
| X...17348(-0.519698)                        | 0.483227 | 1.27721  |
| X...21842(-0.314163)                        | 0.483227 | 1.27721  |
| X...25503(0.0955829)                        | 0.483227 | 1.27721  |
| X...25267                                   | 0.482973 | 1.10997  |
| X2.methoxyacetaminophen.sulfate.(-1.40039)  | 0.480239 | 1.13011  |
| oxypurinol(0.0910283)                       | 0.480239 | 1.13011  |
| pantoprazole(4.25789)                       | 0.480239 | 1.13011  |
| dexlansoprazole(0.659435)                   | 0.480239 | 1.13011  |
| resveratrol.disulfate..1..(0.0580802)       | 0.480239 | 1.13011  |
| ranitidine.N.oxide.(NA)                     | 0.479729 | 1.18267  |

|                                             |          |          |
|---------------------------------------------|----------|----------|
| o.hydroxyatorvastatin(-0.844668)            | 0.479671 | 1.09591  |
| X...16649(-0.304354)                        | 0.479671 | 1.09591  |
| X...17348(1.63575)                          | 0.479671 | 1.09591  |
| nornicotine(0.141413)                       | 0.479209 | 1.19169  |
| oxypurinol(-0.0719257)                      | 0.479209 | 1.19169  |
| atenolol(-0.749083)                         | 0.479209 | 1.19169  |
| X...17348(1.27787)                          | 0.479209 | 1.19169  |
| N.palmitoylserine                           | 0.477395 | 0.335509 |
| X...17348(NA)                               | 0.477    | 0.400779 |
| levetiracetam(-0.0487702)                   | 0.475932 | 1.12714  |
| resveratrol.disulfate..1..(0.594983)        | 0.473383 | 1.08862  |
| X...25523(0.929404)                         | 0.473383 | 1.08862  |
| p.cresol.sulfate                            | 0.473247 | 0.619203 |
| X5.hydroxyhexanoate                         | 0.472507 | 0.552011 |
| X...17348(-0.516676)                        | 0.471981 | 1.18471  |
| X...25523(0.701958)                         | 0.471981 | 1.18471  |
| ethylmalo.te                                | 0.47026  | 1.02427  |
| mycophenolic.acid(NA)                       | 0.470149 | 0.352892 |
| N.acetyltheanine                            | 0.469136 | 0.566609 |
| metoprolol.acid.metabolite.(-0.395267)      | 0.467858 | 1.11627  |
| lidocaine(1.55907)                          | 0.467858 | 1.11627  |
| X2.methoxyacetaminophen.sulfate.(0.0196065) | 0.467858 | 1.11627  |
| nornicotine(-0.395119)                      | 0.467858 | 1.11627  |
| THC.carboxylic.acid(0.627648)               | 0.467858 | 1.11627  |
| meloxicam(0.423894)                         | 0.467858 | 1.11627  |
| Gliclazide(-1.4593)                         | 0.467858 | 1.11627  |
| X...21315(-1.39111)                         | 0.467858 | 1.11627  |
| X...12462                                   | 0.467152 | 0.702574 |

|                                            |          |          |
|--------------------------------------------|----------|----------|
| X2..O.methyluridine                        | 0.466737 | 0.11279  |
| X...11850                                  | 0.466066 | 0.615287 |
| .proxen(0)                                 | 0.46504  | 0.640877 |
| biliverdin                                 | 0.464109 | 0.862535 |
| bradykinin(-0.0749391)                     | 0.462281 | 1.07363  |
| metronidazole(-0.237496)                   | 0.462281 | 1.07363  |
| resveratrol.disulfate..1..(1.6152)         | 0.462281 | 1.07363  |
| X...21315(2.98019)                         | 0.462281 | 1.07363  |
| X2.methoxyacetaminophen.sulfate.(0.218493) | 0.461083 | 1.13336  |
| Nimesulide(-3.68888)                       | 0.461083 | 1.13336  |
| sitagliptin(-4.18646)                      | 0.461083 | 1.13336  |
| tadalafil(1.60609)                         | 0.461083 | 1.13336  |
| resveratrol.disulfate..1..(-0.574831)      | 0.461083 | 1.13336  |
| gamma.glutamylalanine                      | 0.460531 | 0.611474 |
| hexanoylglutamine                          | 0.460075 | 0.75842  |
| X...21312                                  | 0.459583 | 0.397426 |
| X3.hydroxy.3.methylglutarate               | 0.459232 | 0.256412 |
| X...15664                                  | 0.457813 | 0.343878 |
| bradykinin(0.692547)                       | 0.457409 | 1.04743  |
| bradykinin..hydroxy.pro.3.(-1.23203)       | 0.457409 | 1.04743  |
| Fibrinopeptide.A.(-0.928363)               | 0.457409 | 1.04743  |
| atenolol(-0.965744)                        | 0.457409 | 1.04743  |
| metoprolol.acid.metabolite.(0.0041912)     | 0.457173 | 1.10556  |
| valsartan(-2.99174)                        | 0.457173 | 1.10556  |
| cetirizine(0)                              | 0.457173 | 1.10556  |
| meloxicam(-0.0436385)                      | 0.457173 | 1.10556  |
| linoleoylcholine.                          | 0.45685  | 0.701912 |
| X...21315(0)                               | 0.455532 | 0.583436 |



|                                             |          |          |
|---------------------------------------------|----------|----------|
| X13.HODE...9.HODE                           | 0.455083 | 1.10833  |
| X...23974                                   | 0.454155 | 0.629011 |
| X2.hydroxyibuprofen(NA)                     | 0.453875 | 1.10672  |
| bilirubin..Z.Z.                             | 0.453593 | 0.677222 |
| cysteine.s.sulfate                          | 0.453422 | 0.247501 |
| metoprolol.acid.metabolite.(-0.780668)      | 0.453237 | 1.04876  |
| nornicotine(0.317872)                       | 0.453237 | 1.04876  |
| oxypurinol(4.91912)                         | 0.453237 | 1.04876  |
| phenylacetylmethionine(-0.508661)           | 0.453237 | 1.04876  |
| Urolithin.B.glucuronide(-0.0657125)         | 0.453237 | 1.04876  |
| Gliclazide(-3.54391)                        | 0.453237 | 1.04876  |
| X...21315(-1.94142)                         | 0.453237 | 1.04876  |
| X...21315(-2.85597)                         | 0.452308 | 1.23496  |
| X...25503(-0.714779)                        | 0.452308 | 1.23496  |
| X...25523(0.265666)                         | 0.452308 | 1.23496  |
| lidocaine(1.32447)                          | 0.452158 | 1.06941  |
| X2.methoxyacetaminophen.sulfate.(-0.357675) | 0.452158 | 1.06941  |
| pseudoephedrine(1.00063)                    | 0.452158 | 1.06941  |
| metoprolol.acid.metabolite.(0.354031)       | 0.450677 | 1.02341  |
| lidocaine(-0.0499258)                       | 0.450677 | 1.02341  |
| atenolol(0.388183)                          | 0.450677 | 1.02341  |
| ranitidine(-0.0254204)                      | 0.450677 | 1.02341  |
| pseudoephedrine(-0.131933)                  | 0.450677 | 1.02341  |
| tramadol(-0.0235757)                        | 0.450677 | 1.02341  |
| O.desmethyltramadol.glucuronide(0.311521)   | 0.450677 | 1.02341  |
| X...21315(-1.86562)                         | 0.450677 | 1.02341  |
| Gliclazide(-0.61804)                        | 0.449591 | 1.05354  |
| X...25957                                   | 0.447194 | 0.445296 |

|                                               |          |          |
|-----------------------------------------------|----------|----------|
| carboxyibuprofen(-0.0851223)                  | 0.446456 | 1.16387  |
| N4.acetyl.5.hydroxysulfamethoxazole.(-0.4466) | 0.446456 | 1.16387  |
| carboxyibuprofen(NA)                          | 0.444203 | 0.470625 |
| Fibrinopeptide.A..des.ala.1..(1.10569)        | 0.443411 | 0.998068 |
| Fibrinopeptide.A..phosphono.ser.3..(-0.50783) | 0.443411 | 0.998068 |
| warfarin(-0.346159)                           | 0.443411 | 0.998068 |
| daidzein.sulfate..2..(-0.226901)              | 0.443411 | 0.998068 |
| X...21842(NA)                                 | 0.442744 | 0.359686 |
| X3.aminoisobutyrate                           | 0.442438 | 0.800355 |
| saccharin(-1.43381)                           | 0.442195 | 1.03333  |
| phenylacetylmethionine(0.119382)              | 0.442195 | 1.03333  |
| Urolithin.B.glucuronide(-1.59455)             | 0.442195 | 1.03333  |
| Gliclazide(-0.710904)                         | 0.442195 | 1.03333  |
| X...21315(-0.38126)                           | 0.442195 | 1.03333  |
| laurate..12.0.                                | 0.442085 | 0.808976 |
| X...17348(-1.66178)                           | 0.441765 | 1.0101   |
| X...21315(0.163224)                           | 0.441765 | 1.0101   |
| Fibrinopeptide.A..des.ala.1..(-0.688757)      | 0.441441 | 1.08244  |
| oxypurinol(-3.62684)                          | 0.441441 | 1.08244  |
| valsartan(-6.07485)                           | 0.441441 | 1.08244  |
| resveratrol.disulfate..1..(0.431133)          | 0.441441 | 1.08244  |
| X...25523(-0.627734)                          | 0.441441 | 1.08244  |
| saccharin(-1.27726)                           | 0.440614 | 1.10278  |
| THC.carboxylic.acid(0.577512)                 | 0.440614 | 1.10278  |
| X2.methoxyacetaminophen.sulfate.(NA)          | 0.43806  | 0.580481 |
| methyl.4.hydroxybenzoate.sulfate              | 0.434296 | 0.263642 |
| levetiracetam(-0.317317)                      | 0.433599 | 1.10192  |
| phenylacetylglutamate                         | 0.432078 | 0.63668  |

|                                                         |          |          |
|---------------------------------------------------------|----------|----------|
| X1..1.enyl.palmitoyl..2.arachidonoyl.GPC..P.16.0.20.4.. | 0.431709 | 0.791064 |
| metoprolol(0.168223)                                    | 0.431315 | 1.08881  |
| lidocaine(-3.58994)                                     | 0.431315 | 1.08881  |
| nornicotine(-1.01583)                                   | 0.431315 | 1.08881  |
| THC.carboxylic.acid(0.757436)                           | 0.431315 | 1.08881  |
| THC.carboxylic.acid.glucuronide(-0.191282)              | 0.431315 | 1.08881  |
| meloxicam(0.339681)                                     | 0.431315 | 1.08881  |
| Gliclazide(0.34614)                                     | 0.431315 | 1.08881  |
| meloxicam(-0.188018)                                    | 0.431198 | 1.01973  |
| Gliclazide(0.700023)                                    | 0.431198 | 1.01973  |
| nornicotine(-0.384487)                                  | 0.430878 | 1.00089  |
| X2.hydroxyibuprofen(3.08413)                            | 0.430878 | 1.00089  |
| carboxyibuprofen(0.565939)                              | 0.430878 | 1.00089  |
| meloxicam(0.668393)                                     | 0.430878 | 1.00089  |
| Gliclazide(-0.621943)                                   | 0.430878 | 1.00089  |
| X...21315(-0.128402)                                    | 0.430878 | 1.00089  |
| lithocholate.sulfate..1.                                | 0.430801 | 0.437711 |
| Fibrinopeptide.A.(-1.55211)                             | 0.430221 | 1.01274  |
| Fibrinopeptide.A..des.ala.1..(-0.69997)                 | 0.430221 | 1.01274  |
| Fibrinopeptide.A..phosphono.ser.3..(-1.554)             | 0.430221 | 1.01274  |
| X...16649(-1.10352)                                     | 0.430221 | 1.01274  |
| X...21315(0.31313)                                      | 0.429798 | 1.10442  |
| sulfate.of.piperine.metabolite.C18H21NO3..1..           | 0.426662 | 0.211675 |
| fluoxetine(0)                                           | 0.425705 | 0.97773  |
| norfluoxetine(0)                                        | 0.425705 | 0.97773  |
| daidzein.sulfate..2.(-0.934964)                         | 0.425705 | 0.97773  |
| Fibrinopeptide.B..1.13...(-0.853786)                    | 0.425705 | 0.97773  |
| X2.hydroxyibuprofen(-2.10455)                           | 0.42322  | 1.13277  |

|                                            |          |          |
|--------------------------------------------|----------|----------|
| carboxyibuprofen(-3.34671)                 | 0.42322  | 1.13277  |
| daidzein.sulfate..2.(-1.16764)             | 0.42322  | 1.13277  |
| diclofe.c(2.27744)                         | 0.42322  | 1.13277  |
| iminodiacetate..IDA.                       | 0.421612 | 0.319411 |
| valsartan(-3.15825)                        | 0.421493 | 1.11228  |
| levetiracetam(-0.422815)                   | 0.421493 | 1.11228  |
| X...16649(-1.97544)                        | 0.421493 | 1.11228  |
| X...25503(0.264516)                        | 0.421493 | 1.11228  |
| N4.acetyl.5.hydroxysulfamethoxazole.(NA)   | 0.420572 | 0.891213 |
| X...23665                                  | 0.420534 | 0.522278 |
| X...17137                                  | 0.417555 | 0.354585 |
| bradykinin..hydroxy.pro.3.(0.569227)       | 0.417409 | 1.09467  |
| oxypurinol(-0.0531898)                     | 0.417409 | 1.09467  |
| resveratrol.disulfate..1..(0.0415257)      | 0.417409 | 1.09467  |
| montelukast(0.831168)                      | 0.417409 | 1.09467  |
| Gliclazide(0.0329511)                      | 0.417409 | 1.09467  |
| bilirubin..E.Z.or.Z.E..                    | 0.414476 | 0.371797 |
| Fibrinopeptide.A..des.ala.1..(-0.84397)    | 0.414242 | 0.970845 |
| lidocaine(-1.63117)                        | 0.414242 | 0.970845 |
| phenylacetylmethionine(-0.444882)          | 0.414242 | 0.970845 |
| levetiracetam(-0.665727)                   | 0.414242 | 0.970845 |
| daidzein.sulfate..2.(0.186728)             | 0.413939 | 0.98273  |
| X...16649(-1.43339)                        | 0.413939 | 0.98273  |
| leucylglycine(-0.378774)                   | 0.413326 | 1.0652   |
| X...21842(-0.11149)                        | 0.413326 | 1.0652   |
| leucylglycine(0.583667)                    | 0.412845 | 0.92112  |
| X...17348(-0.535802)                       | 0.412845 | 0.92112  |
| Fibrinopeptide.A..des.ala.1..(-0.00883895) | 0.412626 | 0.981983 |

|                                             |          |          |
|---------------------------------------------|----------|----------|
| metoprolol.acid.metabolite.(1.07367)        | 0.412626 | 0.981983 |
| lidocaine(0.23127)                          | 0.412626 | 0.981983 |
| oxypurinol(2.06758)                         | 0.412626 | 0.981983 |
| atenolol(-0.530518)                         | 0.412626 | 0.981983 |
| pseudoephedrine(0.233965)                   | 0.412626 | 0.981983 |
| tramadol(-0.0134906)                        | 0.412626 | 0.981983 |
| O.desmethyltramadol.glucuronide(0.275888)   | 0.412626 | 0.981983 |
| alpha.hydroxymetoprolol(0.422388)           | 0.412626 | 0.981983 |
| phenylacetylmethionine(0.0331446)           | 0.412626 | 0.981983 |
| Urolithin.B.glucuronide(0.637159)           | 0.412626 | 0.981983 |
| Gliclazide(-1.57842)                        | 0.412626 | 0.981983 |
| X...21842(0.748676)                         | 0.412626 | 0.981983 |
| daidzein.sulfate..2.(0.501926)              | 0.411895 | 0.932818 |
| X...16649(1.57082)                          | 0.411895 | 0.932818 |
| daidzein.sulfate..2.(1.59294)               | 0.411733 | 0.912507 |
| X...16649(0.475799)                         | 0.411733 | 0.912507 |
| anthranilate                                | 0.411538 | 0.29186  |
| Fibrinopeptide.A..des.ala.1..(-1.24932)     | 0.410151 | 0.961569 |
| trans.uroca.te                              | 0.408466 | 0.58915  |
| X...16649(-1.0567)                          | 0.406458 | 0.977953 |
| X...12544                                   | 0.404666 | 0.719569 |
| dimethyl.sulfone                            | 0.404062 | 0.321774 |
| X...25523(0)                                | 0.403781 | 0.769393 |
| Fibrinopeptide.A..des.ala.1..(0.799442)     | 0.403217 | 0.942928 |
| X2.methoxyacetaminophen.sulfate.(-0.578391) | 0.403217 | 0.942928 |
| oxypurinol(-0.682801)                       | 0.403217 | 0.942928 |
| oxypurinol(1.43723)                         | 0.40313  | 0.93348  |
| valsartan(-3.58272)                         | 0.40313  | 0.93348  |

|                                               |          |          |
|-----------------------------------------------|----------|----------|
| resveratrol.disulfate..1..(-0.150939)         | 0.40313  | 0.93348  |
| meloxicam(1.79203)                            | 0.40313  | 0.93348  |
| Gliclazide(-0.911552)                         | 0.40313  | 0.93348  |
| X...17348(0.324978)                           | 0.40313  | 0.93348  |
| X2.methoxyacetaminophen.sulfate.(-0.00652122) | 0.401368 | 0.929428 |
| X...21315(-0.806764)                          | 0.401368 | 0.929428 |
| X...25503(-1.16507)                           | 0.401368 | 0.929428 |
| X2.methoxyacetaminophen.sulfate.(-0.201015)   | 0.401288 | 0.931987 |
| bradykinin(-0.242836)                         | 0.400801 | 0.944903 |
| daidzein.sulfate..2.(-0.0465676)              | 0.400801 | 0.944903 |
| X...16649(0.248889)                           | 0.400801 | 0.944903 |
| histidylalanine(-0.411282)                    | 0.40021  | 0.930226 |
| X...21315(-1.23169)                           | 0.40021  | 0.930226 |
| phenylacetylmethionine(-0.175783)             | 0.399023 | 0.951652 |
| X...21315(0.912162)                           | 0.399023 | 0.951652 |
| X...21842(-0.674718)                          | 0.399023 | 0.951652 |
| X...25503(-1.54412)                           | 0.399023 | 0.951652 |
| resveratrol.disulfate..1..(0.00618086)        | 0.398437 | 0.987767 |
| X...21842(-0.413245)                          | 0.398437 | 0.987767 |
| X...25523(2.32224)                            | 0.398437 | 0.987767 |
| daidzein.sulfate..2.(-0.63337)                | 0.398222 | 0.916738 |
| X...21315(1.29102)                            | 0.398222 | 0.916738 |
| N.acetyl.cadaverine                           | 0.394919 | 0.51778  |
| X5.6.dihydrouracil                            | 0.392022 | 0.533813 |
| oxypurinol(-2.19463)                          | 0.391151 | 0.901109 |
| leucylglycine(-0.471124)                      | 0.391151 | 0.901109 |
| X...16649(0.851304)                           | 0.391151 | 0.901109 |
| X...17348(-1.78677)                           | 0.391151 | 0.901109 |

|                                                |          |          |
|------------------------------------------------|----------|----------|
| X3.methoxycatechol.sulfate..1.                 | 0.387825 | 0.482228 |
| metoprolol.acid.metabolite.(0.889577)          | 0.387238 | 0.943996 |
| lidocaine(0.209126)                            | 0.387238 | 0.943996 |
| X2.methoxyacetaminophen.sulfate.(-1.1498)      | 0.387238 | 0.943996 |
| oxypurinol(2.42541)                            | 0.387238 | 0.943996 |
| atenolol(-0.246668)                            | 0.387238 | 0.943996 |
| pseudoephedrine(2.919)                         | 0.387238 | 0.943996 |
| warfarin(-6.57128)                             | 0.387238 | 0.943996 |
| tramadol(-0.0311811)                           | 0.387238 | 0.943996 |
| O.desmethyltramadol.glucuronide(0.215837)      | 0.387238 | 0.943996 |
| alpha.hydroxymetoprolol(-0.159465)             | 0.387238 | 0.943996 |
| cetirizine(-0.152452)                          | 0.387238 | 0.943996 |
| Fibrinopeptide.B..1.13...(-0.15923)            | 0.387238 | 0.943996 |
| Gliclazide(-1.05125)                           | 0.387238 | 0.943996 |
| X...25523(1.99095)                             | 0.387238 | 0.943996 |
| bradykinin(0.540113)                           | 0.386837 | 1.00885  |
| bradykinin..hydroxy.pro.3.(-0.253474)          | 0.386837 | 1.00885  |
| bradykinin..des.arg.9.(-0.573411)              | 0.386837 | 1.00885  |
| Fibrinopeptide.A.(1.57543)                     | 0.386837 | 1.00885  |
| Fibrinopeptide.A..des.ala.1..(0.944645)        | 0.386837 | 1.00885  |
| Fibrinopeptide.A..phosphono.ser.3..(-0.351119) | 0.386837 | 1.00885  |
| HXGXA.(-0.739191)                              | 0.386837 | 1.00885  |
| daidzein.sulfate..2.(-0.432168)                | 0.386837 | 1.00885  |
| Fibrinopeptide.B..1.13...(-0.500545)           | 0.386837 | 1.00885  |
| X...16649(1.29292)                             | 0.386837 | 1.00885  |
| X...17348(0.232856)                            | 0.386837 | 1.00885  |
| X4.hydroxynone.l                               | 0.386649 | 0.284809 |
| o.hydroxyatorvastatin(-0.416425)               | 0.384504 | 1.13761  |

|                                                |          |          |
|------------------------------------------------|----------|----------|
| X...16649(-1.52097)                            | 0.384504 | 1.13761  |
| X...21315(-0.837711)                           | 0.384504 | 1.13761  |
| X...21842(1.00737)                             | 0.384504 | 1.13761  |
| X...25503(-0.524925)                           | 0.384504 | 1.13761  |
| alliin                                         | 0.384277 | 0.443487 |
| X...12798                                      | 0.384203 | 0.351973 |
| atenolol(0.0706448)                            | 0.383718 | 0.8893   |
| X...21315(-1.27225)                            | 0.383718 | 0.8893   |
| metronidazole(-0.352114)                       | 0.383466 | 0.891576 |
| X2.methoxyacetaminophen.sulfate.(0.681429)     | 0.382026 | 0.902375 |
| X2.methoxyacetaminophen.sulfate.(0.455905)     | 0.380947 | 0.955274 |
| Gliclazide(-0.948298)                          | 0.380947 | 0.955274 |
| celecoxib(-1.74813)                            | 0.379541 | 0.862961 |
| sitagliptin(-3.21888)                          | 0.379541 | 0.862961 |
| X...25503(-1.28772)                            | 0.379541 | 0.862961 |
| X...25523(0.126192)                            | 0.379541 | 0.862961 |
| Fibrinopeptide.B..1.13...(NA)                  | 0.379274 | 1.06406  |
| X...11483                                      | 0.378454 | 0.515577 |
| X...17685                                      | 0.375268 | 0.443867 |
| bradykinin(0.276722)                           | 0.374339 | 0.966016 |
| bradykinin..hydroxy.pro.3.(-0.65778)           | 0.374339 | 0.966016 |
| bradykinin..des.arg.9.(-0.000700245)           | 0.374339 | 0.966016 |
| Fibrinopeptide.A.(1.26022)                     | 0.374339 | 0.966016 |
| Fibrinopeptide.A..des.ala.1..(0.961149)        | 0.374339 | 0.966016 |
| Fibrinopeptide.A..phosphono.ser.3..(-0.538368) | 0.374339 | 0.966016 |
| HXGXA.(-0.6757)                                | 0.374339 | 0.966016 |
| X2.methoxyacetaminophen.sulfate.(-2.05494)     | 0.374339 | 0.966016 |
| daidzein.sulfate..2.(1.65372)                  | 0.374339 | 0.966016 |



|                                        |          |          |
|----------------------------------------|----------|----------|
| resveratrol.disulfate..1..(0.0691529)  | 0.374339 | 0.966016 |
| Fibrinopeptide.B..1.13...(-0.350409)   | 0.374339 | 0.966016 |
| Gliclazide(0.729142)                   | 0.374339 | 0.966016 |
| X...16649(3.21725)                     | 0.374339 | 0.966016 |
| X...21842(-0.0648586)                  | 0.374339 | 0.966016 |
| lidocaine(0.202859)                    | 0.374131 | 1.05115  |
| phenylacetylmethionine(-0.502692)      | 0.374131 | 1.05115  |
| X...21842(0.810263)                    | 0.374131 | 1.05115  |
| X...25523(-0.654696)                   | 0.374131 | 1.05115  |
| metoprolol(0.0282959)                  | 0.373142 | 1.02269  |
| X...25503(-0.684187)                   | 0.372431 | 0.88346  |
| saccharin(-1.96969)                    | 0.371702 | 1.0575   |
| X...21842(-0.457601)                   | 0.371702 | 1.0575   |
| X...25523(-0.0430119)                  | 0.371702 | 1.0575   |
| X3..3.hydroxyphenyl.propio.te          | 0.370703 | 0.200837 |
| lidocaine(0.416207)                    | 0.370452 | 0.883431 |
| diclofe.c(-0.0335568)                  | 0.370452 | 0.883431 |
| X...17348(-1.4435)                     | 0.370452 | 0.883431 |
| bradykinin(-1.52005)                   | 0.36921  | 0.883783 |
| X...16649(0.351572)                    | 0.36921  | 0.883783 |
| X...25503(0.40139)                     | 0.368791 | 0.83113  |
| X...11843                              | 0.368549 | 0.50371  |
| Fibrinopeptide.A.(4.39499)             | 0.365346 | 0.851205 |
| Fibrinopeptide.A..des.ala.1..(5.51723) | 0.365346 | 0.851205 |
| Fibrinopeptide.A..phosphono.ser.3..(0) | 0.365346 | 0.851205 |
| X2.hydroxyibuprofen(-0.0483503)        | 0.365346 | 0.851205 |
| Fibrinopeptide.B..1.13...(4.14934)     | 0.365346 | 0.851205 |
| X...21315(-0.689554)                   | 0.365346 | 0.851205 |

|                                          |          |          |
|------------------------------------------|----------|----------|
| X...25503(1.46168)                       | 0.365346 | 0.851205 |
| X...25523(-0.266965)                     | 0.365346 | 0.851205 |
| metoprolol.acid.metabolite.(-2.12026)    | 0.365236 | 0.853452 |
| Fibrinopeptide.A..des.ala.1..(-0.421442) | 0.365143 | 0.969117 |
| X2.hydroxyibuprofen(-0.116534)           | 0.365143 | 0.969117 |
| X...25503(-0.345452)                     | 0.365143 | 0.969117 |
| oxypurinol(1.07186)                      | 0.363575 | 0.978696 |
| X...16649(-1.10533)                      | 0.363575 | 0.978696 |
| X...25503(-0.128174)                     | 0.363575 | 0.978696 |
| Urolithin.B.glucuronide(-0.693947)       | 0.363463 | 0.877752 |
| X...22776                                | 0.362878 | 0.407144 |
| oxypurinol(-0.195528)                    | 0.361997 | 0.865405 |
| X...25503(0.540462)                      | 0.361997 | 0.865405 |
| valsartan(-4.26158)                      | 0.361704 | 0.860619 |
| X...21315(0.562583)                      | 0.361704 | 0.860619 |
| pseudoephedrine(-2.62417)                | 0.359209 | 0.831112 |
| Gliclazide(-1.27011)                     | 0.359209 | 0.831112 |
| bradykinin(-1.30048)                     | 0.355988 | 1.0103   |
| Fibrinopeptide.A.(0.0574195)             | 0.355988 | 1.0103   |
| Fibrinopeptide.A..des.ala.1..(0.629248)  | 0.355988 | 1.0103   |
| leucylglycine(-0.427557)                 | 0.355988 | 1.0103   |
| Fibrinopeptide.B..1.13...(-0.672561)     | 0.355988 | 1.0103   |
| phenolphthalein.beta.D.glucuronide(0)    | 0.354289 | 0.788638 |
| tadalafil(-3.3326)                       | 0.35405  | 0.910511 |
| mannose                                  | 0.353646 | 0.478117 |
| resveratrol.disulfate..1..(-0.56247)     | 0.351869 | 0.821077 |
| Gliclazide(-1.2365)                      | 0.351869 | 0.821077 |
| Fibrinopeptide.A..des.ala.1..(-0.597473) | 0.35181  | 0.793875 |

|                                           |          |          |
|-------------------------------------------|----------|----------|
| X...21315(0.230318)                       | 0.35181  | 0.793875 |
| tauro.beta.muricholate                    | 0.348473 | 0.425833 |
| X...16649(-0.767224)                      | 0.34695  | 0.830162 |
| X...21842(0.46656)                        | 0.34695  | 0.830162 |
| lidocaine(-1.82822)                       | 0.346761 | 0.864939 |
| phenylacetylmethionine(0.58762)           | 0.346761 | 0.864939 |
| bradykinin(-0.406315)                     | 0.346492 | 0.797321 |
| bradykinin..des.arg.9.(-3.0139)           | 0.346492 | 0.797321 |
| X2.methoxyacetaminophen.sulfate.(1.18384) | 0.346492 | 0.797321 |
| Gliclazide(0.957394)                      | 0.346492 | 0.797321 |
| meloxicam(NA)                             | 0.346407 | 0.451711 |
| saccharin(-2.07147)                       | 0.345629 | 0.787677 |
| Gliclazide(-1.28989)                      | 0.345629 | 0.787677 |
| diclofe.c(-0.368169)                      | 0.344514 | 0.992176 |
| oxypurinol(-1.65653)                      | 0.343925 | 0.843927 |
| bradykinin(-2.78062)                      | 0.343797 | 0.810685 |
| Fibrinopeptide.A.(-2.27497)               | 0.343797 | 0.810685 |
| Fibrinopeptide.A..des.ala.1..(-1.82822)   | 0.343797 | 0.810685 |
| daidzein.sulfate..2.(0.855266)            | 0.343797 | 0.810685 |
| Urolithin.B.glucuronide(-0.522392)        | 0.343797 | 0.810685 |
| Gliclazide(-0.771758)                     | 0.343797 | 0.810685 |
| X...21842(-0.214679)                      | 0.343797 | 0.810685 |
| X...25523(-0.627172)                      | 0.343797 | 0.810685 |
| Urolithin.B.glucuronide(-1.08738)         | 0.343172 | 0.768107 |
| X...21315(-1.35209)                       | 0.343172 | 0.768107 |
| bradykinin(0.577456)                      | 0.341451 | 0.839996 |
| bradykinin..hydroxy.pro.3.(0.151862)      | 0.341451 | 0.839996 |
| bradykinin..des.arg.9.(-0.479973)         | 0.341451 | 0.839996 |

|                                               |          |          |
|-----------------------------------------------|----------|----------|
| HXGXA.(-1.3123)                               | 0.341451 | 0.839996 |
| X2.methoxyacetaminophen.sulfate.(1.25416)     | 0.341451 | 0.839996 |
| tadalafil(0.390893)                           | 0.339135 | 0.858225 |
| X...17348(-0.757152)                          | 0.339135 | 0.858225 |
| X...11852                                     | 0.337439 | 0.324214 |
| X...13658                                     | 0.337429 | 0.586913 |
| X2.methoxyacetaminophen.sulfate.(-1.98777)    | 0.337025 | 0.793817 |
| THC.carboxylic.acid(-2.62693)                 | 0.337025 | 0.793817 |
| X...17348(-0.0991576)                         | 0.337025 | 0.793817 |
| Fibrinopeptide.A..des.ala.1..(1.22454)        | 0.336875 | 0.778892 |
| Fibrinopeptide.A.(0)                          | 0.336446 | 0.65093  |
| levetiracetam(-0.455391)                      | 0.336387 | 0.792746 |
| X...21315(3.67334)                            | 0.336387 | 0.792746 |
| X...21842(-0.410377)                          | 0.336387 | 0.792746 |
| Fibrinopeptide.A.(-0.86893)                   | 0.336253 | 0.730741 |
| oxypurinol(-0.364275)                         | 0.336253 | 0.730741 |
| bradykinin..hydroxy.pro.3.(0)                 | 0.335834 | 0.649119 |
| X...25503(0.911318)                           | 0.333796 | 0.787305 |
| nornicotine(-0.391562)                        | 0.333278 | 0.73568  |
| X...21842(1.33597)                            | 0.333013 | 0.799056 |
| X...25523(1.1709)                             | 0.333013 | 0.799056 |
| acetylcarnitine..C2.                          | 0.331965 | 0.675708 |
| sulfate.of.piperine.metabolite.C16H19NO3..2.. | 0.331534 | 0.477258 |
| leucylglycine(0)                              | 0.330944 | 0.473972 |
| saccharin(-2.43383)                           | 0.329399 | 0.793292 |
| phenylacetylmethionine(-0.540598)             | 0.329399 | 0.793292 |
| Urolithin.B.glucuronide(-0.182002)            | 0.329399 | 0.793292 |
| X...16649(0.347624)                           | 0.329399 | 0.793292 |

|                                            |          |          |
|--------------------------------------------|----------|----------|
| X...21315(1.32909)                         | 0.329399 | 0.793292 |
| X...25503(0.0369104)                       | 0.329399 | 0.793292 |
| oxypurinol(-2.56916)                       | 0.328777 | 0.825722 |
| meloxicam(0.558072)                        | 0.328777 | 0.825722 |
| Gliclazide(-0.646645)                      | 0.328777 | 0.825722 |
| X...16649(1.70163)                         | 0.328777 | 0.825722 |
| oxypurinol(-2.2966)                        | 0.327386 | 0.763535 |
| phenylacetylmethionine(-0.760142)          | 0.327386 | 0.763535 |
| X...16649(-0.972068)                       | 0.327386 | 0.763535 |
| pantoprazole(-3.07261)                     | 0.32672  | 1.00375  |
| warfarin(2.54657)                          | 0.32672  | 1.00375  |
| furosemide(-1.92964)                       | 0.32672  | 1.00375  |
| valsartan(-1.27368)                        | 0.32672  | 1.00375  |
| phenylacetylmethionine(-0.159465)          | 0.32672  | 1.00375  |
| resveratrol.disulfate..1..(-0.100594)      | 0.32672  | 1.00375  |
| X...21315(-0.32186)                        | 0.32672  | 1.00375  |
| X4.methylcatechol.sulfate                  | 0.326171 | 0.236512 |
| Fibrinopeptide.A.(-1.0128)                 | 0.324813 | 0.783109 |
| Fibrinopeptide.A..des.ala.1..(-0.182482)   | 0.324813 | 0.783109 |
| diclofe.c(NA)                              | 0.322852 | 0.347948 |
| X...22802                                  | 0.322542 | 0.221429 |
| Gliclazide(-1.5828)                        | 0.32236  | 0.755351 |
| nornicotine(-0.328226)                     | 0.319809 | 0.756665 |
| oxypurinol(0.352486)                       | 0.319809 | 0.756665 |
| valsartan(-0.965218)                       | 0.319809 | 0.756665 |
| X...21315(-0.266443)                       | 0.319809 | 0.756665 |
| X2.methoxyacetaminophen.sulfate.(0.031111) | 0.318857 | 0.731906 |
| lidocaine(-2.46158)                        | 0.317278 | 0.82502  |

|                                           |          |          |
|-------------------------------------------|----------|----------|
| oxypurinol(-1.78916)                      | 0.317278 | 0.82502  |
| X...21315(-0.531198)                      | 0.317278 | 0.82502  |
| bradykinin(-0.0900341)                    | 0.316439 | 0.753624 |
| bradykinin..hydroxy.pro.3.(0.316124)      | 0.316439 | 0.753624 |
| bradykinin..des.arg.9.(-1.36728)          | 0.316439 | 0.753624 |
| Fibrinopeptide.A.(-1.49343)               | 0.316439 | 0.753624 |
| Fibrinopeptide.A..des.ala.1..(-0.84072)   | 0.316439 | 0.753624 |
| Fibrinopeptide.B..1.13...(-1.32351)       | 0.316439 | 0.753624 |
| pantoprazole(-0.661067)                   | 0.316047 | 0.774708 |
| ketopioglitazone(0)                       | 0.316047 | 0.774708 |
| sitagliptin(-3.61192)                     | 0.316047 | 0.774708 |
| resveratrol.disulfate..1..(-0.65143)      | 0.316047 | 0.774708 |
| bradykinin(0)                             | 0.315502 | 0.511033 |
| fluoxetine(1.82106)                       | 0.314014 | 0.778755 |
| norfluoxetine(1.97233)                    | 0.314014 | 0.778755 |
| warfarin(-7.6009)                         | 0.314014 | 0.778755 |
| X...16649(0.0517382)                      | 0.314014 | 0.778755 |
| X...21315(-0.381407)                      | 0.314014 | 0.778755 |
| X...25433                                 | 0.313901 | 0.458972 |
| ranitidine(-1.22861)                      | 0.313776 | 0.742554 |
| leucylglycine(-0.312795)                  | 0.313776 | 0.742554 |
| X...17348(3.10147)                        | 0.313776 | 0.742554 |
| leucylglycine(-0.478358)                  | 0.313723 | 0.736044 |
| X2.methoxyacetaminophen.sulfate.(1.57296) | 0.313043 | 0.724025 |
| metoprolol(-0.0175532)                    | 0.31273  | 0.764185 |
| Fibrinopeptide.A..des.ala.1..(-0.305303)  | 0.31273  | 0.764185 |
| X...21842(0.036814)                       | 0.31273  | 0.764185 |
| X...16649(0)                              | 0.312521 | 0.174333 |

|                                               |          |          |
|-----------------------------------------------|----------|----------|
| pantoprazole(0.0427721)                       | 0.311599 | 0.813588 |
| X2.hydroxyibuprofen(0.176387)                 | 0.311599 | 0.813588 |
| X...16649(0.645951)                           | 0.311599 | 0.813588 |
| sulfate.of.piperine.metabolite.C16H19NO3..3.. | 0.310239 | 0.376965 |
| X...24576(-2.04949)                           | 0.308978 | 0.728731 |
| bradykinin(-0.961288)                         | 0.307533 | 0.910385 |
| HXGXA.(-0.114401)                             | 0.307533 | 0.910385 |
| leucylglycine(-0.0497156)                     | 0.307533 | 0.910385 |
| Fibrinopeptide.B..1.13...(-1.09005)           | 0.307533 | 0.910385 |
| Gliclazide(-3.21389)                          | 0.307533 | 0.910385 |
| X...17348(-1.22418)                           | 0.307533 | 0.910385 |
| X...21315(-1.14917)                           | 0.307533 | 0.910385 |
| X...25503(-1.63322)                           | 0.307533 | 0.910385 |
| X...25523(-1.39191)                           | 0.307533 | 0.910385 |
| Gliclazide(0.65097)                           | 0.304884 | 0.748265 |
| X...25503(0.511206)                           | 0.304884 | 0.748265 |
| X2.methoxyacetaminophen.sulfate.(0.339468)    | 0.304832 | 0.722946 |
| X...16649(0.38859)                            | 0.304832 | 0.722946 |
| ketopioglitazone(NA)                          | 0.303896 | 0.445    |
| leucylglycine(0.418447)                       | 0.303838 | 0.920445 |
| phenylacetylmethionine(0)                     | 0.303838 | 0.920445 |
| X...16649(0.349177)                           | 0.303838 | 0.920445 |
| X...12407(1.09788)                            | 0.303765 | 0.732073 |
| oxypurinol(0.386486)                          | 0.302032 | 0.751372 |
| metronidazole(-2.44993)                       | 0.302032 | 0.751372 |
| X3.hydroxysebacate                            | 0.30103  | 0.453033 |
| warfarin(-0.29303)                            | 0.298139 | 0.719741 |
| Gliclazide(-2.94314)                          | 0.298139 | 0.719741 |

|                                       |          |          |
|---------------------------------------|----------|----------|
| warfarin(-5.09947)                    | 0.297406 | 0.702449 |
| furosemide(-1.4662)                   | 0.297406 | 0.702449 |
| X...21842(-1.04897)                   | 0.297406 | 0.702449 |
| X...25523(-0.529159)                  | 0.297406 | 0.702449 |
| nornicotine(0.964967)                 | 0.296495 | 0.706164 |
| atenolol(-1.08945)                    | 0.296495 | 0.706164 |
| pantoprazole(-0.343054)               | 0.296058 | 0.82245  |
| metronidazole(0.686676)               | 0.296058 | 0.82245  |
| resveratrol.disulfate..1..(-0.764858) | 0.296058 | 0.82245  |
| Fibrinopeptide.A.(NA)                 | 0.295518 | 0.449082 |
| warfarin(NA)                          | 0.294104 | 0.481775 |
| X2.piperidinone                       | 0.292004 | 0.626663 |
| piperine                              | 0.290294 | 0.387124 |
| X...17348(0.967402)                   | 0.289252 | 0.680955 |
| fluoxetine(-3.2264)                   | 0.286075 | 0.668274 |
| nornicotine(-0.083599)                | 0.286075 | 0.668274 |
| X...16649(0.252003)                   | 0.286075 | 0.668274 |
| oxypurinol(2.23972)                   | 0.283073 | 0.833758 |
| Gliclazide(-0.291556)                 | 0.283073 | 0.833758 |
| lidocaine(-0.940583)                  | 0.281945 | 0.705968 |
| X...16649(-0.277468)                  | 0.281945 | 0.705968 |
| lidocaine(-3.2114)                    | 0.280922 | 0.658352 |
| meloxicam(-3.4389)                    | 0.280922 | 0.658352 |
| Gliclazide(-2.96037)                  | 0.280922 | 0.658352 |
| X...21315(2.95435)                    | 0.280922 | 0.658352 |
| valsartan(NA)                         | 0.280607 | 0.580812 |
| resveratrol.disulfate..1..(0.179902)  | 0.276426 | 0.677707 |
| Gliclazide(-2.28475)                  | 0.276201 | 0.714871 |



|                                         |          |          |
|-----------------------------------------|----------|----------|
| X...17348(1.16159)                      | 0.276201 | 0.714871 |
| celecoxib(NA)                           | 0.27496  | 0.437684 |
| lidocaine(-0.412037)                    | 0.272334 | 0.661872 |
| X2.hydroxyibuprofen(-3.89222)           | 0.272334 | 0.661872 |
| X...16649(-0.956592)                    | 0.272025 | 0.650395 |
| fluoxetine(-1.67131)                    | 0.27188  | 0.732341 |
| norfluoxetine(0.125575)                 | 0.27188  | 0.732341 |
| daidzein.sulfate..2.(-0.650663)         | 0.27188  | 0.732341 |
| Gliclazide(-0.72237)                    | 0.27188  | 0.732341 |
| X...16649(0.574533)                     | 0.27188  | 0.732341 |
| X...21842(0.273152)                     | 0.27188  | 0.732341 |
| X...21842(0)                            | 0.270414 | 0.421069 |
| X...17348(0.925885)                     | 0.270062 | 0.618752 |
| Urolithin.B.glucuronide(-1.17733)       | 0.268464 | 0.623029 |
| X...17348(-2.33511)                     | 0.268177 | 0.645062 |
| X...21315(-0.911303)                    | 0.268177 | 0.645062 |
| bradykinin(0.357325)                    | 0.266831 | 0.681644 |
| X...21842(0.77242)                      | 0.266831 | 0.681644 |
| metronidazole(2.43646)                  | 0.265472 | 0.592535 |
| sitagliptin(NA)                         | 0.263518 | 0.790887 |
| X...16649(0.0868197)                    | 0.263288 | 0.676161 |
| bradykinin(-0.619153)                   | 0.262195 | 0.719723 |
| bradykinin..hydroxy.pro.3.(-0.784167)   | 0.262195 | 0.719723 |
| Fibrinopeptide.A.(-1.90784)             | 0.262195 | 0.719723 |
| Fibrinopeptide.A..des.ala.1..(-1.15423) | 0.262195 | 0.719723 |
| phenylacetylmethionine(0.476296)        | 0.262195 | 0.719723 |
| Urolithin.B.glucuronide(-0.237877)      | 0.262195 | 0.719723 |
| Gliclazide(-0.407517)                   | 0.262195 | 0.719723 |

|                                             |          |          |
|---------------------------------------------|----------|----------|
| X...21842(-0.785043)                        | 0.262195 | 0.719723 |
| X...25503(2.48059)                          | 0.262195 | 0.719723 |
| X...23997                                   | 0.26218  | 0.382135 |
| X2.methoxyacetaminophen.sulfate.(-0.517179) | 0.260903 | 0.614048 |
| phenylacetylmethionine(0.113775)            | 0.260903 | 0.614048 |
| valsartan(-2.69267)                         | 0.260067 | 0.628581 |
| leucylglycine(0.168476)                     | 0.259494 | 0.623844 |
| X...25503(-1.04441)                         | 0.259494 | 0.623844 |
| metoprolol.acid.metabolite.(-1.90987)       | 0.258177 | 0.641822 |
| oxypurinol(-0.203341)                       | 0.258177 | 0.641822 |
| atenolol(0.107778)                          | 0.258177 | 0.641822 |
| X...16649(0.176974)                         | 0.258177 | 0.641822 |
| metoprolol.acid.metabolite.(0.486984)       | 0.257681 | 0.653341 |
| lidocaine(0.005286)                         | 0.257681 | 0.653341 |
| atenolol(0.30476)                           | 0.257681 | 0.653341 |
| pseudoephedrine(-0.140527)                  | 0.257681 | 0.653341 |
| tramadol(0.422978)                          | 0.257681 | 0.653341 |
| O.desmethyiltramadol.glucuronide(0.354031)  | 0.257681 | 0.653341 |
| alpha.hydroxymetoprolol(0)                  | 0.257681 | 0.653341 |
| Urolithin.B.glucuronide(-0.908571)          | 0.257681 | 0.653341 |
| X2.methoxyacetaminophen.sulfate.(1.35043)   | 0.256009 | 0.613031 |
| Gliclazide(-3.18689)                        | 0.255848 | 0.612474 |
| X...16649(-1.54787)                         | 0.255848 | 0.612474 |
| X...16124                                   | 0.254995 | 0.157014 |
| X2.methoxyacetaminophen.sulfate.(-3.41428)  | 0.253387 | 0.604267 |
| histidylalanine(-0.231554)                  | 0.253387 | 0.604267 |
| warfarin(1.92343)                           | 0.253387 | 0.604267 |
| pantoprazole(-3.4546)                       | 0.252294 | 0.578362 |

|                                            |          |          |
|--------------------------------------------|----------|----------|
| metronidazole(-4.35053)                    | 0.252294 | 0.578362 |
| phenylacetylmethionine(-0.589508)          | 0.252094 | 0.664806 |
| X...21315(-1.18417)                        | 0.252094 | 0.664806 |
| X...25503(1.83133)                         | 0.252094 | 0.664806 |
| daidzein.sulfate..2.(2.83547)              | 0.251444 | 0.619745 |
| X...16649(-0.220148)                       | 0.251444 | 0.619745 |
| X2.methoxyacetaminophen.sulfate.(1.43423)  | 0.251316 | 0.599077 |
| metoprolol.acid.metabolite.(0.121775)      | 0.249377 | 0.71808  |
| pantoprazole(-3.55435)                     | 0.249377 | 0.71808  |
| alpha.hydroxymetoprolol(-3.41125)          | 0.249377 | 0.71808  |
| Gliclazide(0.941139)                       | 0.249377 | 0.71808  |
| nornicotine(0.0581746)                     | 0.249085 | 0.603786 |
| metronidazole(-1.01971)                    | 0.249085 | 0.603786 |
| Gliclazide(-0.0544562)                     | 0.249085 | 0.603786 |
| X...21842(0.248109)                        | 0.247057 | 0.58004  |
| X...25523(-0.951659)                       | 0.247057 | 0.58004  |
| X...21315(-1.15138)                        | 0.247032 | 0.615297 |
| nornicotine(0.327936)                      | 0.245628 | 0.572502 |
| saccharin(-1.72149)                        | 0.244677 | 0.727952 |
| X2.methoxyacetaminophen.sulfate.(-2.28573) | 0.244677 | 0.727952 |
| daidzein.sulfate..2.(0.113507)             | 0.244677 | 0.727952 |
| X...17348(-1.22112)                        | 0.244677 | 0.727952 |
| X...21315(2.52158)                         | 0.244677 | 0.727952 |
| furosemide(-1.87732)                       | 0.243916 | 0.603678 |
| valsartan(-0.806316)                       | 0.243916 | 0.603678 |
| X...25503(2.41205)                         | 0.243916 | 0.603678 |
| carboxyibuprofen(-1.3579)                  | 0.243296 | 0.609668 |
| meloxicam(-3.81218)                        | 0.243296 | 0.609668 |

|                                             |          |          |
|---------------------------------------------|----------|----------|
| X4.methylbenzenesulfo.te                    | 0.242614 | 0.392298 |
| warfarin(-0.577856)                         | 0.241944 | 0.61322  |
| valsartan(-0.00893984)                      | 0.241944 | 0.61322  |
| phenylacetylmethionine(-0.585908)           | 0.241944 | 0.61322  |
| levetiracetam(-0.0500309)                   | 0.241944 | 0.61322  |
| resveratrol.disulfate..1..(-0.542316)       | 0.241944 | 0.61322  |
| X...16649(-1.05613)                         | 0.241944 | 0.61322  |
| X...17348(-0.183682)                        | 0.241944 | 0.61322  |
| X...21842(-0.205795)                        | 0.241944 | 0.61322  |
| Fibrinopeptide.A..des.ala.1..(NA)           | 0.240826 | 0.422595 |
| metoprolol.acid.metabolite.(0)              | 0.239317 | 0.637124 |
| ranitidine(0.684258)                        | 0.239317 | 0.637124 |
| alpha.hydroxymetoprolol(-2.41912)           | 0.239317 | 0.637124 |
| ranitidine.N.oxide.(0.381582)               | 0.239317 | 0.637124 |
| X5.hydroxyindole.sulfate                    | 0.238539 | 0.262011 |
| X4.imidazoleacetate                         | 0.236035 | 0.478104 |
| bradykinin(-0.773057)                       | 0.235818 | 0.617701 |
| bradykinin..hydroxy.pro.3..(-0.517011)      | 0.235818 | 0.617701 |
| uracil                                      | 0.233727 | 0.26893  |
| diclofe.c(-0.0327298)                       | 0.232224 | 0.529559 |
| resveratrol.disulfate..1..(0.800251)        | 0.232224 | 0.529559 |
| resveratrol.disulfate..1..(-0.0905814)      | 0.230738 | 0.624179 |
| X2.methoxyacetaminophen.sulfate.(-0.216913) | 0.230713 | 0.56333  |
| oxypurinol(-0.245901)                       | 0.228441 | 0.560159 |
| warfarin(-0.881648)                         | 0.228441 | 0.560159 |
| furosemide(2.12479)                         | 0.228441 | 0.560159 |
| X6.hydroxywarfarin(0)                       | 0.228441 | 0.560159 |
| X2.methoxyacetaminophen.sulfate.(0.795388)  | 0.226399 | 0.553237 |

|                                            |          |          |
|--------------------------------------------|----------|----------|
| Fibrinopeptide.A..des.ala.1..(0.501078)    | 0.225767 | 0.545807 |
| X...16649(-1.45758)                        | 0.225767 | 0.545807 |
| nornicotine(-0.787238)                     | 0.22111  | 0.523348 |
| X...24576(-2.67801)                        | 0.22111  | 0.523348 |
| levetiracetam(-0.12579)                    | 0.220726 | 0.557842 |
| lidocaine(2.02543)                         | 0.218672 | 0.5476   |
| Gliclazide(1.01693)                        | 0.218672 | 0.5476   |
| bradykinin(-0.979497)                      | 0.218499 | 0.559384 |
| venlafaxine(0)                             | 0.218499 | 0.559384 |
| venlafaxine(NA)                            | 0.218499 | 0.559384 |
| X2.hydroxyibuprofen(-0.266834)             | 0.218499 | 0.559384 |
| diclofe.c(-0.483535)                       | 0.218499 | 0.559384 |
| oxypurinol(0)                              | 0.216774 | 0.527192 |
| Gliclazide(-0.788557)                      | 0.216774 | 0.527192 |
| X2.methoxyacetaminophen.sulfate.(-1.81462) | 0.215122 | 0.532567 |
| pseudoephedrine(2.11676)                   | 0.215122 | 0.532567 |
| X...25503(-0.390675)                       | 0.215122 | 0.532567 |
| oxypurinol(0.524077)                       | 0.210718 | 0.555378 |
| pioglitazone(-4.15409)                     | 0.208214 | 0.516509 |
| ketopioglitazone(1.58176)                  | 0.208214 | 0.516509 |
| hydroxypioglitazone..M.IV.(-2.3838)        | 0.208214 | 0.516509 |
| resveratrol.disulfate..1..(-1.89845)       | 0.208214 | 0.516509 |
| X...12407(0.0362355)                       | 0.206701 | 0.457302 |
| saccharin(-1.28049)                        | 0.202904 | 0.510608 |
| X2.methoxyacetaminophen.sulfate.(0.554517) | 0.202904 | 0.510608 |
| X...16649(-0.371209)                       | 0.202904 | 0.510608 |
| X2.methoxyacetaminophen.sulfate.(-1.24271) | 0.20202  | 0.543042 |
| HXGXA.(-0.94572)                           | 0.201466 | 0.505047 |

|                                             |          |          |
|---------------------------------------------|----------|----------|
| oxypurinol(5.31488)                         | 0.201466 | 0.505047 |
| leucylglycine(-0.485483)                    | 0.201466 | 0.505047 |
| Gliclazide(0.537838)                        | 0.201466 | 0.505047 |
| X...21842(2.44533)                          | 0.201466 | 0.505047 |
| lidocaine(0.484153)                         | 0.1968   | 0.497344 |
| Gliclazide(-0.795623)                       | 0.1968   | 0.497344 |
| oxypurinol(-0.147688)                       | 0.19579  | 0.487823 |
| Gliclazide(-1.09333)                        | 0.195779 | 0.493262 |
| X...21315(-0.288482)                        | 0.195779 | 0.493262 |
| X2.methoxyacetaminophen.sulfate.(-1.21638)  | 0.195264 | 0.501061 |
| oxypurinol(-3.33822)                        | 0.195264 | 0.501061 |
| resveratrol.disulfate..1..(0.236415)        | 0.195264 | 0.501061 |
| Gliclazide(-0.583755)                       | 0.195264 | 0.501061 |
| X...21842(-0.721752)                        | 0.195264 | 0.501061 |
| X...17348(-0.992362)                        | 0.194175 | 0.523452 |
| X...16649(0.974371)                         | 0.193068 | 0.474135 |
| X...17348(-1.58719)                         | 0.193068 | 0.474135 |
| lidocaine(-4.01184)                         | 0.19267  | 0.453148 |
| nornicotine(-0.59602)                       | 0.190906 | 0.44196  |
| oxypurinol(0.81731)                         | 0.190906 | 0.44196  |
| resveratrol.disulfate..1..(-0.0407178)      | 0.19082  | 0.5367   |
| lidocaine(-0.575542)                        | 0.189765 | 0.56915  |
| tramadol(-5.05146)                          | 0.189765 | 0.56915  |
| X...17348(-0.148152)                        | 0.189765 | 0.56915  |
| Fibrinopeptide.A..des.ala.1..(-0.749083)    | 0.189542 | 0.453701 |
| oxypurinol(-1.32238)                        | 0.184983 | 0.418645 |
| carboxyibuprofen(-0.476907)                 | 0.184983 | 0.418645 |
| X2.methoxyacetaminophen.sulfate.(-0.993712) | 0.174192 | 0.445973 |

|                                            |          |          |
|--------------------------------------------|----------|----------|
| oxypurinol(3.01618)                        | 0.173484 | 0.422985 |
| diclofe.c(-0.829425)                       | 0.173484 | 0.422985 |
| metoprolol(-0.21406)                       | 0.172975 | 0.469801 |
| carboxyibuprofen(-3.21888)                 | 0.172975 | 0.469801 |
| X...25523(-1.36806)                        | 0.172975 | 0.469801 |
| X...25503(-2.15935)                        | 0.16879  | 0.415194 |
| phenylacetylmethionine(-0.447069)          | 0.166281 | 0.397345 |
| levetiracetam(-0.408269)                   | 0.166281 | 0.397345 |
| phenylacetylmethionine(-0.533924)          | 0.16559  | 0.398307 |
| X...21315(-0.569868)                       | 0.16397  | 0.415089 |
| X...17348(-2.3279)                         | 0.161308 | 0.423575 |
| X2.methoxyacetaminophen.sulfate.(-2.94314) | 0.160212 | 0.527591 |
| oxypurinol(-1.66231)                       | 0.1567   | 0.407149 |
| Gliclazide(1.59148)                        | 0.1567   | 0.407149 |
| X...25523(0.267428)                        | 0.1567   | 0.407149 |
| pioglitazone(0.435153)                     | 0.155292 | 0.40362  |
| metoprolol.acid.metabolite.(2.03332)       | 0.155292 | 0.40362  |
